# Supplementary material
Source: publisher figshare collection journal article supplement (https://gsajournals.figshare.com/ndownloader/files/13812338)
Supplement: Supplementary file 1 [file 13812338]

## Sheet: WEW_v2.0
Table S1 Raw data for scaffold order, orientation, and length for the WEW_v2.0 pseudomolecules
WEW_v2.0 psm	WEW_2.0 order	WEW_1.0 psm	WEW_1.0 order	Scaffold_v5 ID	Psm start	Psm end	WEW_v2.0 orientation	Scaffold length	Psm length
Chr1A	1	chrUn		scaffold4696	1	296684	-	296684	609493238
Chr1A	2	chr1A	1	scaffold32673	406972	1006154	+	599183	609493238
Chr1A	3	chr1A	2	scaffold71789	1007155	2519087	+	1511933	609493238
Chr1A	4	chr1A	3	scaffold140773	3082211	3585905	+	503695	609493238
Chr1A	5	chr1A	4	scaffold137138	3644185	4090682	+	446498	609493238
Chr1A	6	chrUn		scaffold18526-2	4091683	4239029	+	147347	609493238
Chr1A	7	chr1A	5	scaffold87556	4627293	5128156	-	500864	609493238
Chr1A	8	chr1A	6	scaffold9851	5136441	6377940	+	1241500	609493238
Chr1A	9	chrUn		scaffold73918	6385960	6536773	-	150814	609493238
Chr1A	10	chr1A	7	scaffold95248	6551386	7534866	-	983481	609493238
Chr1A	11	chr1A	8	scaffold47234	7567115	7896137	+	329023	609493238
Chr1A	12	chrUn		scaffold33611	7941692	8013521	+	71830	609493238
Chr1A	13	chr1A	9	scaffold2153	8480443	10287561	+	1807119	609493238
Chr1A	14	chrUn		scaffold98334	10372149	10702089	-	329941	609493238
Chr1A	15	chr1A	10	scaffold48403	10710589	11145772	+	435184	609493238
Chr1A	16	chr1A	11	scaffold57391	11170791	11595657	+	424867	609493238
Chr1A	17	chrUn		scaffold12800	11665858	11904601	+	238744	609493238
Chr1A	18	chr1A	12	scaffold27450	11921785	12352240	+	430456	609493238
Chr1A	19	chr1A	13	scaffold107316	12502067	12832125	-	330059	609493238
Chr1A	20	chrUn		scaffold57678	13068034	13453006	+	384973	609493238
Chr1A	21	chr1A	14	scaffold14776_r2	13494334	14069810	-	575477	609493238
Chr1A	22	chrUn		scaffold9526	14070811	14212436	-	141626	609493238
Chr1A	23	chr1A	15	scaffold48147	14355361	15076837	+	721477	609493238
Chr1A	24	chr1A	16	scaffold54942	15269518	18809953	-	3540436	609493238
Chr1A	25	chr1A	17	scaffold38988	18810453	21014064	-	2203612	609493238
Chr1A	26	chr1A	18	scaffold147049	21123925	22262143	+	1138219	609493238
Chr1A	27	chrUn		scaffold94095	22263142	22889326	+	626185	609493238
Chr1A	28	chr1A	19	scaffold80833	23078656	23441736	-	363081	609493238
Chr1A	29	chrUn		scaffold122022	23469008	23816153	-	347146	609493238
Chr1A	30	chr1A	20	scaffold105314	23863845	25301109	-	1437265	609493238
Chr1A	31	chrUn		scaffold4662	25320743	25530900	-	210158	609493238
Chr1A	32	chrUn		scaffold76340	25547476	25802196	-	254721	609493238
Chr1A	33	chrUn		scaffold3740	25924813	26187896	-	263084	609493238
Chr1A	34	chr1A	21	scaffold96822	26214670	27101033	+	886364	609493238
Chr1A	35	chr1A	22	scaffold40189	27102034	28440170	-	1338137	609493238
Chr1A	36	chr1A	23	scaffold145745	28508016	31816568	-	3308553	609493238
Chr1A	37	chrUn		scaffold63473	31844268	32099793	-	255526	609493238
Chr1A	38	chrUn		scaffold2736	32120591	32403983	-	283393	609493238
Chr1A	39	chr1A	24	scaffold76834	32434423	33095039	+	660617	609493238
Chr1A	40	chrUn		scaffold14162	33164711	33416440	-	251730	609493238
Chr1A	41	chr1A	25	scaffold79570	33417441	36520536	-	3103096	609493238
Chr1A	42	chr1A	26	scaffold40156	36520637	37943331	-	1422695	609493238
Chr1A	43	chr1A	27	scaffold111369	38505559	39505990	+	1000432	609493238
Chr1A	44	chr1A	28	scaffold34633	39534209	40229059	+	694851	609493238
Chr1A	45	chr1A	29	scaffold82553	40272077	44540204	+	4268128	609493238
Chr1A	46	chr1A	30	scaffold105525	44611947	51426445	+	6814499	609493238
Chr1A	47	chr1A	31	scaffold72708	51485107	52331674	+	846568	609493238
Chr1A	48	chr1A	32	scaffold150821	52916743	53605628	-	688886	609493238
Chr1A	49	chr1A	33	scaffold125014	53711665	55920117	-	2208453	609493238
Chr1A	50	chr1A	34	scaffold39978	55934251	56442118	-	507868	609493238
Chr1A	51	chr1A	35	scaffold146105	56654239	57683633	-	1029395	609493238
Chr1A	52	chr1A	36	scaffold16022	57684634	61107605	+	3422972	609493238
Chr1A	53	chrUn		scaffold49925	61288609	61445662	+	157054	609493238
Chr1A	54	chr1A	37	scaffold82132	61475981	63790847	+	2314867	609493238
Chr1A	55	chr1A	38	scaffold11474-3	63823013	68225642	-	4402630	609493238
Chr1A	56	chr1A	39	scaffold17674	68236268	76911948	-	8675681	609493238
Chr1A	57	chr1A	40	scaffold29392	76921436	92689807	-	15768372	609493238
Chr1A	58	chr1A	41	scaffold97273	92696863	103885621	-	11188759	609493238
Chr1A	59	chr1A	42	scaffold107832	103886121	106796197	+	2910077	609493238
Chr1A	60	chr1A	43	scaffold3290-2	106801113	109560438	+	2759326	609493238
Chr1A	61	chr1A	44	scaffold129237	109570307	125844393	+	16274087	609493238
Chr1A	62	chr1A	46	scaffold108104	125844893	127163138	+	1318246	609493238
Chr1A	63	chr1A	47	scaffold42419	127171136	131266247	+	4095112	609493238
Chr1A	64	chr1A	48	scaffold18575	131279069	132893505	+	1614437	609493238
Chr1A	65	chr6B	2159	scaffold40842_r2	132893729	133124828	-	231100	609493238
Chr1A	66	chr1A	49	scaffold70469	133179358	147008754	-	13829397	609493238
Chr1A	67	chr1A	50	scaffold94024	147026066	154289637	+	7263572	609493238
Chr1A	68	chr1A	51	scaffold9979	154294819	162134218	+	7839400	609493238
Chr1A	69	chr1A	52	scaffold45079	162153792	170188227	+	8034436	609493238
Chr1A	70	chr1A	53	scaffold118503	170353081	172223276	+	1870196	609493238
Chr1A	71	chr1A	54	scaffold51762	172268350	175889239	-	3620890	609493238
Chr1A	72	chr1A	55	scaffold87481	175889340	178364663	-	2475324	609493238
Chr1A	73	chr1A	56	scaffold44189	178364764	204945988	+	26581225	609493238
Chr1A	74	chr1A	57	scaffold43401	205355986	212474583	+	7118598	609493238
Chr1A	75	chr1A	58	scaffold53809	212857661	214557446	+	1699786	609493238
Chr1A	76	chr1A	59	scaffold23010	214575856	222783258	-	8207403	609493238
Chr1A	77	chr1A	60	scaffold58465	222784258	223614540	+	830283	609493238
Chr1A	78	chr1A	61	scaffold46978	223615541	224752489	+	1136949	609493238
Chr1A	79	chr1A	62	scaffold45924	224753490	225299996	+	546507	609493238
Chr1A	80	chr1A	63	scaffold965	225300997	225794583	+	493587	609493238
Chr1A	81	chr1A	64	scaffold25358	225795584	226206957	+	411374	609493238
Chr1A	82	chr1A	65	scaffold50182	226207958	229269420	+	3061463	609493238
Chr1A	83	chr1A	66	scaffold23845	229356753	232829844	-	3473092	609493238
Chr1A	84	chr1A	67	scaffold80165	232843328	234853984	+	2010657	609493238
Chr1A	85	chr1A	68	scaffold22530	234910840	238362276	-	3451437	609493238
Chr1A	86	chr1A	69	scaffold31497-2	238374883	242284652	+	3909770	609493238
Chr1A	87	chr1A	70	scaffold96208	242300933	245804445	-	3503513	609493238
Chr1A	88	chr1A	71	scaffold104059	245806085	258382215	+	12576131	609493238
Chr1A	89	chr1A	72	scaffold30630	258588966	302370337	-	43781372	609493238
Chr1A	90	chr1A	73	scaffold14076	302377091	321829391	-	19452301	609493238
Chr1A	91	chr1A	74	scaffold94347	321836894	322303539	-	466646	609493238
Chr1A	92	chr1A	75	scaffold61770	322304039	335168206	-	12864168	609493238
Chr1A	93	chr1A	76	scaffold108782	335177805	344169605	-	8991801	609493238
Chr1A	94	chr1A	77	scaffold34857	344178164	364478649	-	20300486	609493238
Chr1A	95	chr1A	78	scaffold70554	364494907	369923160	-	5428254	609493238
Chr1A	96	chr1A	79	scaffold104087	370019613	390601875	+	20582263	609493238
Chr1A	97	chr1A	80	scaffold1394	390606693	391673221	+	1066529	609493238
Chr1A	98	chr1A	81	scaffold58980	391823734	414378956	+	22555223	609493238
Chr1A	99	chr1A	82	scaffold62150	414469271	424782046	+	10312776	609493238
Chr1A	100	chr1A	83	scaffold119210	424789487	425941660	+	1152174	609493238
Chr1A	101	chr1A	84	scaffold6755	426249669	427553576	+	1303908	609493238
Chr1A	102	chrUn		scaffold154247	427554577	427914922	-	360346	609493238
Chr1A	103	chr1A	85	scaffold77563	427995190	448975410	-	20980221	609493238
Chr1A	104	chr1A	86	scaffold1877	449647805	453604073	+	3956269	609493238
Chr1A	105	chr1A	87	scaffold132446	453639003	457124034	+	3485032	609493238
Chr1A	106	chr1A	88	scaffold50616	457163534	458609697	-	1446164	609493238
Chr1A	107	chr1A	89	scaffold14467	458631841	459478309	+	846469	609493238
Chr1A	108	chr1A	91	scaffold33933	459484017	459961569	-	477553	609493238
Chr1A	109	chr1A	92	scaffold46132	459962792	480263949	+	20301158	609493238
Chr1A	110	chr1A	93	scaffold5830	480371448	482457809	-	2086362	609493238
Chr1A	111	chr1A	94	scaffold36387	482582098	491262678	-	8680581	609493238
Chr1A	112	chr1A	95	scaffold89645	491316992	494216040	-	2899049	609493238
Chr1A	113	chr1A	96	scaffold56296	494224845	501081165	+	6856321	609493238
Chr1A	114	chr1A	97	scaffold698-2	501113367	502809314	-	1695948	609493238
Chr1A	115	chr1A	98	scaffold20768	502815605	504685499	+	1869895	609493238
Chr1A	116	chr1A	99	scaffold7591	504719179	507641195	-	2922017	609493238
Chr1A	117	chr1A	100	scaffold34113-3	507642196	527610955	+	19968760	609493238
Chr1A	118	chr1A	101	scaffold77556	527618742	529577469	-	1958728	609493238
Chr1A	119	chr1A	102	scaffold50100	529820538	532410909	+	2590372	609493238
Chr1A	120	chr1A	103	scaffold31178	532490403	533346412	-	856010	609493238
Chr1A	121	chr1A	104	scaffold25	533436723	536209170	+	2772448	609493238
Chr1A	122	chr1A	105	scaffold158931	536718158	544226276	+	7508119	609493238
Chr1A	123	chr1A	106	scaffold114760	544394703	546341028	+	1946326	609493238
Chr1A	124	chr1A	107	scaffold32050	546351788	554275991	+	7924204	609493238
Chr1A	125	chr1A	108	scaffold42286	554398393	555916822	+	1518430	609493238
Chr1A	126	chrUn		scaffold14959	555925672	556119443	-	193772	609493238
Chr1A	127	chr1A	109	scaffold88807	556134953	558270284	-	2135332	609493238
Chr1A	128	chr1A	110	scaffold52476	558292095	565068291	+	6776197	609493238
Chr1A	129	chrUn		scaffold69726	565502573	565646395	-	143823	609493238
Chr1A	130	chr1A	111	scaffold63359	565655846	566059471	+	403626	609493238
Chr1A	131	chr1A	112	scaffold96469	566071093	567316449	+	1245357	609493238
Chr1A	132	chr1A	113	scaffold77122	567322068	570383162	+	3061095	609493238
Chr1A	133	chrUn		scaffold117462	570450305	570575813	-	125509	609493238
Chr1A	134	chr1A	114	scaffold148600	570583205	571742366	-	1159162	609493238
Chr1A	135	chr1A	115	scaffold22679	571770145	573598229	+	1828085	609493238
Chr1A	136	chr1A	116	scaffold36647	573598330	574505781	+	907452	609493238
Chr1A	137	chr1A	117	scaffold84815	574648775	575160503	+	511729	609493238
Chr1A	138	chrUn		scaffold145953	575339061	575431314	-	92254	609493238
Chr1A	139	chr1A	118	scaffold47505	575435374	577021620	+	1586247	609493238
Chr1A	140	chr1A	119	scaffold138480	577112822	580425078	+	3312257	609493238
Chr1A	141	chr1A	120	scaffold8539	580456913	581102003	+	645091	609493238
Chr1A	142	chrUn		scaffold14361-8	581104978	581318497	-	213520	609493238
Chr1A	143	chr1A	121	scaffold52898	581394963	586720627	+	5325665	609493238
Chr1A	144	chr1A	122	scaffold84641-3	586823534	588593490	+	1769957	609493238
Chr1A	145	chr1A	123	scaffold63944	588630359	591073912	+	2443554	609493238
Chr1A	146	chr1A	124	scaffold21428	591078248	592371239	+	1292992	609493238
Chr1A	147	chr1A	125	scaffold72768	592381784	594317971	-	1936188	609493238
Chr1A	148	chr1A	126	scaffold2709	594347223	595350732	-	1003510	609493238
Chr1A	149	chr1A	127	scaffold69815	595399294	595900090	+	500797	609493238
Chr1A	150	chr1A	128	scaffold69093	595900316	596298748	-	398433	609493238
Chr1A	151	chr1A	129	scaffold4809	596305834	596979732	+	673899	609493238
Chr1A	152	chr1A	130	scaffold45510	597220127	600130214	-	2910088	609493238
Chr1A	153	chrUn		scaffold25077	600151498	600512450	-	360953	609493238
Chr1A	154	chr1A	131	scaffold62450	600517310	604249029	-	3731720	609493238
Chr1A	155	chr1A	132	scaffold34301-2	604249480	605635989	+	1386510	609493238
Chr1A	156	chr1A	133	scaffold8045	605691833	608465081	-	2773249	609493238
Chr1A	157	chr1A	134	scaffold105587-2	608472728	609493238	+	1020512	609493238
Chr1B	158	chrUn		scaffold22880	1	87173	-	87173	712626289
Chr1B	159	chr1B	136	scaffold30699	87274	2242083	+	2154810	712626289
Chr1B	160	chr1B	137	scaffold54744-2	2243084	4285898	+	2042815	712626289
Chr1B	161	chr1B	135	scaffold22199	6146382	7052719	+	906338	712626289
Chr1B	162	chr1B	138	scaffold31850_r1	7110723	7511248	+	400526	712626289
Chr1B	163	chr1B	139	scaffold142822-1	7514223	8544931	-	1030709	712626289
Chr1B	164	chrUn		scaffold40670	8553362	8767809	-	214448	712626289
Chr1B	165	chr1B	140	scaffold73497	8804720	10686568	+	1881849	712626289
Chr1B	166	chrUn		scaffold96391	10725385	11001851	-	276467	712626289
Chr1B	167	chr1B	141	scaffold88748	11009241	11612479	+	603239	712626289
Chr1B	168	chr1B	142	scaffold118425	11696199	12598071	+	901873	712626289
Chr1B	169	chrUn		scaffold118644	12608870	12896830	+	287961	712626289
Chr1B	170	chr1B	147	scaffold1374	13321760	13869315	+	547556	712626289
Chr1B	171	chr1B	146	scaffold49523	13870315	14297024	+	426710	712626289
Chr1B	172	chr1B	145	scaffold136849	14310703	14685811	+	375109	712626289
Chr1B	173	chr1B	144	scaffold28758	14832992	15311164	+	478173	712626289
Chr1B	174	chrUn		scaffold27837	15825818	15944471	+	118654	712626289
Chr1B	175	chr1B	143	scaffold14810	15992861	16552335	+	559475	712626289
Chr1B	176	chrUn		scaffold117669	16678239	16968319	+	290081	712626289
Chr1B	177	chrUn		scaffold107983	16969319	17276791	+	307473	712626289
Chr1B	178	chr1B	148	scaffold58996	17276892	17848673	-	571782	712626289
Chr1B	179	chr1B	149	scaffold63424	17942472	18754971	+	812500	712626289
Chr1B	180	chrUn		scaffold68890	18779176	18913115	-	133940	712626289
Chr1B	181	chr1B	150	scaffold88268	19184053	20197151	-	1013099	712626289
Chr1B	182	chr1B	151	scaffold39465	20535899	21206543	+	670645	712626289
Chr1B	183	chr1B	152	scaffold102501	21217296	21967885	+	750590	712626289
Chr1B	184	chrUn		scaffold81559	22113162	22352206	-	239045	712626289
Chr1B	185	chr1B	153	scaffold46139-2	22363866	23214667	-	850802	712626289
Chr1B	186	chrUn		scaffold31314	23465926	23532802	-	66877	712626289
Chr1B	187	chr1B	154	scaffold63672	23587308	24100624	+	513317	712626289
Chr1B	188	chr1B	155	scaffold33641	24110875	26346905	-	2236031	712626289
Chr1B	189	chrUn		scaffold114663	26356678	26512243	-	155566	712626289
Chr1B	190	chr1B	156	scaffold74718	26513244	27061805	+	548562	712626289
Chr1B	191	chrUn		scaffold115560	27682290	27807833	+	125544	712626289
Chr1B	192	chrUn		scaffold107896	28245627	28463383	-	217757	712626289
Chr1B	193	chrUn		scaffold145976	28474896	28692387	-	217492	712626289
Chr1B	194	chr1B	157	scaffold670	28823125	30434462	+	1611338	712626289
Chr1B	195	chr1B	158	scaffold77731	30435832	32106222	-	1670391	712626289
Chr1B	196	chrUn		scaffold8880	32135332	32380265	-	244934	712626289
Chr1B	197	chr1B	159	scaffold124141	32499360	33073252	+	573893	712626289
Chr1B	198	chr1B	160	scaffold39965	33075114	33979398	-	904285	712626289
Chr1B	199	chr1B	161	scaffold47091	34013546	34558575	+	545030	712626289
Chr1B	200	chr1B	162	scaffold24755	34630477	35353703	+	723227	712626289
Chr1B	201	chr1B	163	scaffold82011	35393216	36591501	-	1198286	712626289
Chr1B	202	chr1B	164	scaffold6907	36803988	39827710	+	3023723	712626289
Chr1B	203	chr1B	169	scaffold66730	39828709	40343882	+	515174	712626289
Chr1B	204	chrUn		scaffold52578	40366816	40449227	-	82412	712626289
Chr1B	205	chr1B	168	scaffold82021	40546775	41266235	+	719461	712626289
Chr1B	206	chr1B	167	scaffold38700	41404316	42513926	+	1109611	712626289
Chr1B	207	chr1B	166	scaffold42536	42541789	43716886	+	1175098	712626289
Chr1B	208	chr1B	165	scaffold56668	43748292	44465680	+	717389	712626289
Chr1B	209	chr1B	170	scaffold90283	44466681	44919582	+	452902	712626289
Chr1B	210	chr1B	171	scaffold2402	44927720	45389163	+	461444	712626289
Chr1B	211	chr1B	172	scaffold60751	45555387	49739416	-	4184030	712626289
Chr1B	212	chr1B	173	scaffold17840-1	49770387	51728422	+	1958036	712626289
Chr1B	213	chr1B	174	scaffold117579	51801555	53463056	-	1661502	712626289
Chr1B	214	chr1B	175	scaffold66733	53471364	53904930	-	433567	712626289
Chr1B	215	chr1B	176	scaffold60280	53905931	56740840	-	2834910	712626289
Chr1B	216	chr1B	177	scaffold119481	56749207	59933161	+	3183955	712626289
Chr1B	217	chr1B	178	scaffold93194	60159879	62542628	+	2382750	712626289
Chr1B	218	chr1B	138	scaffold31850_r2	62595994	63949892	-	1353899	712626289
Chr1B	219	chr1B	179	scaffold74	63950391	64888121	+	937731	712626289
Chr1B	220	chr1B	180	scaffold106495	64897234	68630644	-	3733411	712626289
Chr1B	221	chr1B	181	scaffold12624	68638854	71845992	-	3207139	712626289
Chr1B	222	chr1B	182	scaffold98197	71846993	72635132	+	788140	712626289
Chr1B	223	chr1B	251	scaffold35345	72636133	75836111	+	3199979	712626289
Chr1B	224	chr1B	252	scaffold74470	75885585	79474900	+	3589316	712626289
Chr1B	225	chr1B	253	scaffold30064	79477235	82151300	+	2674066	712626289
Chr1B	226	chr1B	254	scaffold3633	82176768	90417660	-	8240893	712626289
Chr1B	227	chr1B	255	scaffold149197	90423897	93529671	+	3105775	712626289
Chr1B	228	chr1B	256	scaffold112409	93543734	95078974	-	1535241	712626289
Chr1B	229	chr1B	183	scaffold34658	95121309	97292709	+	2171401	712626289
Chr1B	230	chr1B	184	scaffold151092	97597772	98508546	-	910775	712626289
Chr1B	231	chr1B	185	scaffold80287	98530277	108600873	+	10070597	712626289
Chr1B	232	chr1B	186	scaffold50365	108600974	112078662	+	3477689	712626289
Chr1B	233	chrUn		scaffold58861	112079663	112224220	+	144558	712626289
Chr1B	234	chr1B	187	scaffold6787	112224824	113720520	+	1495697	712626289
Chr1B	235	chr1B	188	scaffold138823	113729607	114314111	+	584505	712626289
Chr1B	236	chr1B	189	scaffold69042	114315112	114692396	+	377285	712626289
Chr1B	237	chr1B	190	scaffold26032	114693397	119353422	-	4660026	712626289
Chr1B	238	chr1B	191	scaffold24569	119435881	121185942	+	1750062	712626289
Chr1B	239	chr1B	192	scaffold31875	121258742	124918886	-	3660145	712626289
Chr1B	240	chr1B	193	scaffold80156	124968895	125757622	-	788728	712626289
Chr1B	241	chr1B	194	scaffold108812	125791065	126575188	-	784124	712626289
Chr1B	242	chr1B	195	scaffold96433	126589630	129098705	-	2509076	712626289
Chr1B	243	chr1B	196	scaffold71641	129099205	137170118	-	8070914	712626289
Chr1B	244	chr1B	197	scaffold2772	137176146	138694394	+	1518249	712626289
Chr1B	245	chr1B	198	scaffold33038	138695515	143070322	-	4374808	712626289
Chr1B	246	chr1B	199	scaffold132149-5	143077815	145230646	+	2152832	712626289
Chr1B	247	chr1B	200	scaffold29642	145272998	145587280	-	314283	712626289
Chr1B	248	chr1B	201	scaffold9802	145600877	151412848	-	5811972	712626289
Chr1B	249	chr1B	202	scaffold9803	151419771	154235266	+	2815496	712626289
Chr1B	250	chr1B	203	scaffold105570	154249221	155347331	+	1098111	712626289
Chr1B	251	chr1B	204	scaffold17363	155364167	155648082	-	283916	712626289
Chr1B	252	chr1B	205	scaffold110875-3	155652043	163239663	+	7587621	712626289
Chr1B	253	chr1B	206	scaffold101375	163248177	163637838	+	389662	712626289
Chr1B	254	chr1B	207	scaffold50288	163638839	170985038	-	7346200	712626289
Chr1B	255	chrUn		scaffold26700_r1	170995500	171242902	-	247403	712626289
Chr1B	256	chrUn		scaffold18348	171273170	171508837	-	235668	712626289
Chr1B	257	chr1B	208	scaffold2906-2	171509838	175906586	+	4396749	712626289
Chr1B	258	chr1B	209	scaffold60973	175907587	182053926	-	6146340	712626289
Chr1B	259	chr1B	210	scaffold29526	182054027	189644142	+	7590116	712626289
Chr1B	260	chr1B	211	scaffold22462-2	189735905	194548371	-	4812467	712626289
Chr1B	261	chr1B	212	scaffold37258-1	194551635	195143504	+	591870	712626289
Chr1B	262	chr1B	213	scaffold25642	195157319	202093252	+	6935934	712626289
Chr1B	263	chr1B	214	scaffold7448	202191665	202896722	+	705058	712626289
Chr1B	264	chr1B	215	scaffold108938	202911643	212020424	+	9108782	712626289
Chr1B	265	chr1B	216	scaffold20433	212183573	212736469	-	552897	712626289
Chr1B	266	chr1B	217	scaffold119802	212816338	214678512	+	1862175	712626289
Chr1B	267	chr1B	218	scaffold54558	214722951	219950190	+	5227240	712626289
Chr1B	268	chr1B	219	scaffold22638	220067894	232707725	-	12639832	712626289
Chr1B	269	chr1B	220	scaffold117077	232707826	234202557	-	1494732	712626289
Chr1B	270	chr1B	221	scaffold135571	234361244	235353893	-	992650	712626289
Chr1B	271	chr1B	223	scaffold92697	235354894	236102285	+	747392	712626289
Chr1B	272	chr1B	222	scaffold150736	236283117	236939314	-	656198	712626289
Chr1B	273	chr1B	224	scaffold31212	236940315	246261825	-	9321511	712626289
Chr1B	274	chr1B	225	scaffold55288-1	246262826	249163705	-	2900880	712626289
Chr1B	275	chr1B	226	scaffold63257	249197386	249601593	+	404208	712626289
Chr1B	276	chr1B	227	scaffold66774	249602594	249970384	+	367791	712626289
Chr1B	277	chr1B	228	scaffold119894-1	250071126	252149762	+	2078637	712626289
Chr1B	278	chr1B	229	scaffold40198	252150763	263980464	-	11829702	712626289
Chr1B	279	chr1B	230	scaffold18034	263981465	265965054	+	1983590	712626289
Chr1B	280	chr1B	231	scaffold58276	265966055	266834281	+	868227	712626289
Chr1B	281	chr1B	232	scaffold17085-2	267225500	270204179	-	2978680	712626289
Chr1B	282	chr1B	233	scaffold19210	270205180	272866321	+	2661142	712626289
Chr1B	283	chr1B	234	scaffold45827	272867322	273366846	+	499525	712626289
Chr1B	284	chr1B	235	scaffold41602	273367847	273796601	+	428755	712626289
Chr1B	285	chr1B	236	scaffold94389-9	273797602	279725911	-	5928310	712626289
Chr1B	286	chrUn		scaffold55795-2	279726912	279893054	+	166143	712626289
Chr1B	287	chr1B	237	scaffold55795-4	279896622	284549439	+	4652818	712626289
Chr1B	288	chr1B	238	scaffold69544	284577037	287008900	-	2431864	712626289
Chr1B	289	chr1B	239	scaffold14607	287009901	288444897	+	1434997	712626289
Chr1B	290	chr1B	240	scaffold84272	288455369	290474634	-	2019266	712626289
Chr1B	291	chr1B	241	scaffold62985-1	290516093	300308577	+	9792485	712626289
Chr1B	292	chr1B	246	scaffold118517	300326710	301693857	+	1367148	712626289
Chr1B	293	chr1B	245	scaffold1567	301717031	302650342	-	933312	712626289
Chr1B	294	chr1B	244	scaffold116107	302655545	302973726	+	318182	712626289
Chr1B	295	chr1B	243	scaffold28138-1	302981521	305695281	+	2713761	712626289
Chr1B	296	chr1B	242	scaffold57769	305699211	313415363	+	7716153	712626289
Chr1B	297	chr1B	248	scaffold22524	313424559	313837331	+	412773	712626289
Chr1B	298	chr1B	249	scaffold3992	313842176	315741556	+	1899381	712626289
Chr1B	299	chr1B	250	scaffold60893	315742557	317681208	-	1938652	712626289
Chr1B	300	chrUn		scaffold52229	317742927	317839767	-	96841	712626289
Chr1B	301	chr1B	257	scaffold32488	317840768	321331951	+	3491184	712626289
Chr1B	302	chrUn		scaffold43215	321388737	321524855	+	136119	712626289
Chr1B	303	chr1B	258	scaffold65729	321525856	321930200	+	404345	712626289
Chr1B	304	chr1B	259	scaffold78277	321955952	325201651	+	3245700	712626289
Chr1B	305	chr1B	260	scaffold67952	325233352	327084269	-	1850918	712626289
Chr1B	306	chr1B	261	scaffold31196	327092244	329353462	+	2261219	712626289
Chr1B	307	chr1B	262	scaffold1501	329354463	331202904	+	1848442	712626289
Chr1B	308	chr1B	263	scaffold25465	331262745	342960209	-	11697465	712626289
Chr1B	309	chr1B	264	scaffold5376	342961210	347638894	+	4677685	712626289
Chr1B	310	chr1B	265	scaffold81583	347648358	349392170	+	1743813	712626289
Chr1B	311	chr1B	266	scaffold6323	349448818	357510335	-	8061518	712626289
Chr1B	312	chr1B	267	scaffold122176	357566050	359838243	-	2272194	712626289
Chr1B	313	chr1B	268	scaffold25444	359854351	360073072	+	218722	712626289
Chr1B	314	chr1B	269	scaffold85325	360105400	365643615	+	5538216	712626289
Chr1B	315	chr1B	270	scaffold59010	365644616	371330410	+	5685795	712626289
Chr1B	316	chr1B	271	scaffold94394	371331411	373069018	-	1737608	712626289
Chr1B	317	chr1B	272	scaffold22538	373069518	378870322	-	5800805	712626289
Chr1B	318	chr1B	273	scaffold81893	378870822	386654409	+	7783588	712626289
Chr1B	319	chr1B	274	scaffold95933	386660944	387271705	+	610762	712626289
Chr1B	320	chr1B	275	scaffold40935	387272205	393151075	-	5878871	712626289
Chr1B	321	chr1B	276	scaffold154412	393155910	400528243	+	7372334	712626289
Chr1B	322	chr1B	277	scaffold67366	400545197	402448681	+	1903485	712626289
Chr1B	323	chr1B	278	scaffold86223	402449736	405619819	-	3170084	712626289
Chr1B	324	chr1B	279	scaffold38433	405629380	419705313	+	14075934	712626289
Chr1B	325	chr1B	280	scaffold106550	419777860	422035902	-	2258043	712626289
Chr1B	326	chr1B	281	scaffold70699	422225056	442095818	+	19870763	712626289
Chr1B	327	chr1B	282	scaffold29277	442168994	445554279	+	3385286	712626289
Chr1B	328	chr1B	283	scaffold109023	445623235	451232399	-	5609165	712626289
Chr1B	329	chr1B	284	scaffold99674-1	451234427	461008870	-	9774444	712626289
Chr1B	330	chr1B	285	scaffold85125-3	461092709	475835987	-	14743279	712626289
Chr1B	331	chr1B	286	scaffold9589	475860255	479237766	-	3377512	712626289
Chr1B	332	chr1B	287	scaffold11188-1	479246122	498821975	+	19575854	712626289
Chr1B	333	chr1B	288	scaffold39480	498822976	502268317	-	3445342	712626289
Chr1B	334	chr1B	289	scaffold21661	502269318	503842313	-	1572996	712626289
Chr1B	335	chr1B	290	scaffold87899	503842813	508111448	-	4268636	712626289
Chr1B	336	chr1B	291	scaffold4752-3	508124509	508442438	+	317930	712626289
Chr1B	337	chr1B	292	scaffold83256	508550444	509021015	-	470572	712626289
Chr1B	338	chr1B	293	scaffold7402	509025204	518633889	-	9608686	712626289
Chr1B	339	chr1B	294	scaffold26649-3	518739564	519793432	-	1053869	712626289
Chr1B	340	chr1B	295	scaffold99062	519794433	521395856	+	1601424	712626289
Chr1B	341	chr1B	296	scaffold34556	521398240	522364691	-	966452	712626289
Chr1B	342	chr1B	297	scaffold4625	522589964	530268395	+	7678432	712626289
Chr1B	343	chr1B	298	scaffold67989	530269396	539695523	-	9426128	712626289
Chr1B	344	chr1B	299	scaffold134972	539704915	542808979	-	3104065	712626289
Chr1B	345	chr1B	300	scaffold27972-2	542815268	543478785	+	663518	712626289
Chr1B	346	chr1B	301	scaffold62586	543479786	558695919	-	15216134	712626289
Chr1B	347	chr1B	302	scaffold38812	558728540	572343755	+	13615216	712626289
Chr1B	348	chr1B	303	scaffold130571	572348123	574335274	-	1987152	712626289
Chr1B	349	chr1B	304	scaffold12879	574360240	575636691	-	1276452	712626289
Chr1B	350	chr1B	305	scaffold4728	575636716	577955790	-	2319075	712626289
Chr1B	351	chr1B	306	scaffold75709	577956290	580061002	+	2104713	712626289
Chr1B	352	chr1B	307	scaffold91543	580066732	583680906	+	3614175	712626289
Chr1B	353	chr1B	308	scaffold62941	583737998	585280572	+	1542575	712626289
Chr1B	354	chr1B	309	scaffold76313	585363576	588481594	+	3118019	712626289
Chr1B	355	chr1B	310	scaffold105091	588492648	589222779	+	730132	712626289
Chr1B	356	chr1B	312	scaffold11474-1	589227037	591690188	+	2463152	712626289
Chr1B	357	chr1B	313	scaffold22992	591690320	592107984	-	417665	712626289
Chr1B	358	chr1B	314	scaffold33774	592265900	597303751	-	5037852	712626289
Chr1B	359	chr1B	315	scaffold133990	597305479	598180743	-	875265	712626289
Chr1B	360	chr1B	316	scaffold84973	598400317	603815467	+	5415151	712626289
Chr1B	361	chr1B	317	scaffold83606	603833486	605914751	-	2081266	712626289
Chr1B	362	chr1B	318	scaffold30127	605961908	615969827	+	10007920	712626289
Chr1B	363	chr1B	319	scaffold68242	616064011	620523822	-	4459812	712626289
Chr1B	364	chr1B	320	scaffold109858	620720742	622086761	-	1366020	712626289
Chr1B	365	chr1B	321	scaffold74717	622087762	623578051	+	1490290	712626289
Chr1B	366	chr1B	322	scaffold105687-2	623578152	624279058	+	700907	712626289
Chr1B	367	chr1B	323	scaffold89599	624279674	625834830	+	1555157	712626289
Chr1B	368	chr1B	324	scaffold14691	625839788	628710302	+	2870515	712626289
Chr1B	369	chr1B	325	scaffold15438	628713872	632287835	+	3573964	712626289
Chr1B	370	chr1B	326	scaffold16140-1	632288335	636194994	+	3906660	712626289
Chr1B	371	chr1B	327	scaffold58986-1	636254068	639253275	-	2999208	712626289
Chr1B	372	chr1B	328	scaffold120168	639517106	644019221	-	4502116	712626289
Chr1B	373	chr1B	329	scaffold8674	644041771	644796833	+	755063	712626289
Chr1B	374	chrUn		scaffold54917	644991213	645127675	+	136463	712626289
Chr1B	375	chr1B	330	scaffold155992_r2	645128145	646364385	+	1236241	712626289
Chr1B	376	chr1B	331	scaffold66827	646501312	647816816	+	1315505	712626289
Chr1B	377	chr1B	332	scaffold135899	647864244	652856601	-	4992358	712626289
Chr1B	378	chrUn		scaffold15275	652866205	653237946	+	371742	712626289
Chr1B	379	chr1B	333	scaffold6862	653310285	655113494	+	1803210	712626289
Chr1B	380	chr1B	334	scaffold11090	655127042	656883258	+	1756217	712626289
Chr1B	381	chr3A	835	scaffold30430-1_r2	656890356	657222175	+	331820	712626289
Chr1B	382	chr1B	335	scaffold86751	657354164	657677038	-	322875	712626289
Chr1B	383	chr1B	336	scaffold33409	657700794	660256520	+	2555727	712626289
Chr1B	384	chr1B	337	scaffold6998	660287713	663741797	-	3454085	712626289
Chr1B	385	chr1B	338	scaffold3047	663784615	664119968	+	335354	712626289
Chr1B	386	chr1B	339	scaffold23255	664138194	665647975	-	1509782	712626289
Chr1B	387	chr1B	340	scaffold32971	665655924	668298517	+	2642594	712626289
Chr1B	388	chr1B	341	scaffold59528	668308472	672657651	-	4349180	712626289
Chr1B	389	chr1B	342	scaffold69255	672672169	672940744	+	268576	712626289
Chr1B	390	chr1B	343	scaffold35068	673029895	674307309	+	1277415	712626289
Chr1B	391	chr1B	344	scaffold11199	674661972	675135345	+	473374	712626289
Chr1B	392	chrUn		scaffold83486	675155954	675233439	-	77486	712626289
Chr1B	393	chrUn		scaffold1743	675359758	675528102	+	168345	712626289
Chr1B	394	chr1B	345	scaffold65010	675541060	678254667	+	2713608	712626289
Chr1B	395	chr1B	347	scaffold11828	678299991	678675636	+	375646	712626289
Chr1B	396	chr1B	348	scaffold4000	679095799	680259493	+	1163695	712626289
Chr1B	397	chr1B	349	scaffold136634	680415044	681779377	+	1364334	712626289
Chr1B	398	chr1B	350	scaffold115570	681791385	688399233	-	6607849	712626289
Chr1B	399	chr1B	346	scaffold31192	688400234	689066325	+	666092	712626289
Chr1B	400	chr1B	351	scaffold130746	689067326	689459610	+	392285	712626289
Chr1B	401	chr1B	352	scaffold8347	689492932	691099184	-	1606253	712626289
Chr1B	402	chr1B	353	scaffold147013	691126686	691498589	+	371904	712626289
Chr1B	403	chr1B	354	scaffold29529	691523843	693082217	-	1558375	712626289
Chr1B	404	chr1B	355	scaffold1193	693116626	694133694	-	1017069	712626289
Chr1B	405	chr1B	356	scaffold157680	694500141	697766738	+	3266598	712626289
Chr1B	406	chr1B	357	scaffold70123	697941448	699132764	+	1191317	712626289
Chr1B	407	chr1B	358	scaffold81256	699471366	700061702	-	590337	712626289
Chr1B	408	chr1B	359	scaffold69620	700098791	700750945	-	652155	712626289
Chr1B	409	chrUn		scaffold5263	700760758	700825729	+	64972	712626289
Chr1B	410	chrUn		scaffold116007	700930681	701083758	-	153078	712626289
Chr1B	411	chrUn		scaffold36553-1	701122760	701401528	+	278769	712626289
Chr1B	412	chr1B	360	scaffold22505	701402529	702381448	-	978920	712626289
Chr1B	413	chr1B	361	scaffold130669	702381948	703258763	-	876816	712626289
Chr1B	414	chr1B	362	scaffold154081	703259764	704012926	-	753163	712626289
Chr1B	415	chr1B	363	scaffold27402	704388045	705310016	+	921972	712626289
Chr1B	416	chr1B	364	scaffold31385	707224342	707724785	+	500444	712626289
Chr1B	417	chr1B	365	scaffold64926	707725786	708178366	+	452581	712626289
Chr1B	418	chrUn		scaffold60222	708179367	708477022	+	297656	712626289
Chr1B	419	chr1B	366	scaffold50562	708488823	709094662	+	605840	712626289
Chr1B	420	chr1B	367	scaffold2874	709095663	711215883	+	2120221	712626289
Chr1B	421	chr1B	368	scaffold48077	711226352	712626289	+	1399938	712626289
Chr2A	422	chr2A	371	scaffold31939	1	561607	+	561607	788782410
Chr2A	423	chr2A	370	scaffold24368	590611	1567506	-	976896	788782410
Chr2A	424	chr2A	369	scaffold100813	1634810	2734311	-	1099502	788782410
Chr2A	425	chrUn		scaffold88008	2768557	3086096	-	317540	788782410
Chr2A	426	chrUn		scaffold33148	3284501	3455209	+	170709	788782410
Chr2A	427	chr2A	372	scaffold3886	3586948	6485023	+	2898076	788782410
Chr2A	428	chr2A	373	scaffold103979	6729379	7322480	-	593102	788782410
Chr2A	429	chr2A	374	scaffold74812	7383660	9125935	+	1742276	788782410
Chr2A	430	chr2A	375	scaffold68438	9154887	11384779	+	2229893	788782410
Chr2A	431	chr2A	376	scaffold4685	11457878	11961657	+	503780	788782410
Chr2A	432	chr2A	377	scaffold91070	11970847	12535743	+	564897	788782410
Chr2A	433	chr2A	378	scaffold24102	12619813	16836345	-	4216533	788782410
Chr2A	434	chr2A	379	scaffold24914	16937892	19306472	-	2368581	788782410
Chr2A	435	chr2A	380	scaffold41914	19558845	22189426	+	2630582	788782410
Chr2A	436	chrUn		scaffold74578	22233226	22406434	-	173209	788782410
Chr2A	437	chr2A	381	scaffold2609	22758525	23780957	+	1022433	788782410
Chr2A	438	chr2A	382	scaffold43009	23811677	24398125	+	586449	788782410
Chr2A	439	chr2A	383	scaffold58091	24401221	24962160	-	560940	788782410
Chr2A	440	chr2A	384	scaffold30888	24963161	26747611	+	1784451	788782410
Chr2A	441	chr2A	385	scaffold105168	26747712	28753126	-	2005415	788782410
Chr2A	442	chr2A	386	scaffold55929	30276639	31392192	-	1115554	788782410
Chr2A	443	chr2A	387	scaffold60572	31393193	31982605	+	589413	788782410
Chr2A	444	chr2A	388	scaffold50900	31983606	34329936	-	2346331	788782410
Chr2A	445	chr2A	389	scaffold67932	34394160	34825180	+	431021	788782410
Chr2A	446	chr2A	390	scaffold85202	34932324	36099577	+	1167254	788782410
Chr2A	447	chr2A	391	scaffold125419	36100077	37297787	+	1197711	788782410
Chr2A	448	chr2A	392	scaffold8115	37371525	44442963	-	7071439	788782410
Chr2A	449	chr2A	393	scaffold96702	44530397	45670212	+	1139816	788782410
Chr2A	450	chrUn		scaffold46802	45679940	45817009	-	137070	788782410
Chr2A	451	chr2A	394	scaffold23329	45894796	47549368	-	1654573	788782410
Chr2A	452	chr2A	395	scaffold98982	47694503	48636680	-	942178	788782410
Chr2A	453	chr2A	396	scaffold18919	48682001	49716839	+	1034839	788782410
Chr2A	454	chr2A	397	scaffold41675	49718154	50626424	+	908271	788782410
Chr2A	455	chr2A	398	scaffold126218	50644424	51331124	+	686701	788782410
Chr2A	456	chr2A	399	scaffold113199	51371874	52313106	-	941233	788782410
Chr2A	457	chr2A	400	scaffold28698	52320928	56202912	-	3881985	788782410
Chr2A	458	chr2A	401	scaffold42212	56231031	56735865	+	504835	788782410
Chr2A	459	chr2A	402	scaffold72593	56742128	61305309	+	4563182	788782410
Chr2A	460	chr2A	403	scaffold39907	61332675	66048766	-	4716092	788782410
Chr2A	461	chr2A	404	scaffold44999	66056398	75711034	+	9654637	788782410
Chr2A	462	chr2A	405	scaffold7625	75716166	78541960	-	2825795	788782410
Chr2A	463	chr2A	406	scaffold6630	78561388	79301193	+	739806	788782410
Chr2A	464	chr2A	407	scaffold11083	79309657	80754984	-	1445328	788782410
Chr2A	465	chr2A	408	scaffold106787	80755085	87973176	+	7218092	788782410
Chr2A	466	chr2A	409	scaffold62655	88225442	93939599	+	5714158	788782410
Chr2A	467	chr2A	410	scaffold1289	93943829	94425095	-	481267	788782410
Chr2A	468	chr2A	411	scaffold26027	94710538	102026703	+	7316166	788782410
Chr2A	469	chr2A	412	scaffold149020	102036996	104067550	+	2030555	788782410
Chr2A	470	chr2A	413	scaffold20566	104195908	104786395	-	590488	788782410
Chr2A	471	chr2A	414	scaffold109796	104787395	105448746	+	661352	788782410
Chr2A	472	chr2A	415	scaffold62506	105462661	108685875	-	3223215	788782410
Chr2A	473	chr2A	416	scaffold105806	108698180	136281223	-	27583044	788782410
Chr2A	474	chr2A	417	scaffold10083	136282435	140336089	-	4053655	788782410
Chr2A	475	chr2A	418	scaffold55527	140347041	153397715	-	13050675	788782410
Chr2A	476	chr2A	419	scaffold4505	153398215	170268730	+	16870516	788782410
Chr2A	477	chr2A	420	scaffold5313	170274761	174690517	+	4415757	788782410
Chr2A	478	chr2A	421	scaffold12791	174691017	182237742	+	7546726	788782410
Chr2A	479	chr2A	422	scaffold64298	182265738	185884668	-	3618931	788782410
Chr2A	480	chr2A	423	scaffold7749	185887643	191135766	+	5248124	788782410
Chr2A	481	chr2A	424	scaffold6330	191154784	194369154	+	3214371	788782410
Chr2A	482	chr2A	425	scaffold51907	194404238	197120993	+	2716756	788782410
Chr2A	483	chr2A	426	scaffold120221	197134783	203737672	-	6602890	788782410
Chr2A	484	chr2A	427	scaffold62837	203754806	204384252	+	629447	788782410
Chr2A	485	chr2A	428	scaffold44493	204400668	205917066	+	1516399	788782410
Chr2A	486	chr2A	429	scaffold30322	205919865	222938944	-	17019080	788782410
Chr2A	487	chr2A	430	scaffold117953	222946104	232240563	-	9294460	788782410
Chr2A	488	chr2A	431	scaffold67040	232244984	239947032	-	7702049	788782410
Chr2A	489	chr2A	434	scaffold51811	239948033	242604657	-	2656625	788782410
Chr2A	490	chr2A	435	scaffold30168	242610739	243046406	-	435668	788782410
Chr2A	491	chr2A	436	scaffold2258	243051431	263823294	-	20771864	788782410
Chr2A	492	chr2A	437	scaffold110693-3	263932969	266003903	+	2070935	788782410
Chr2A	493	chr2A	438	scaffold101032	266143174	266595813	-	452640	788782410
Chr2A	494	chr2A	439	scaffold116821-1	266596313	267345489	-	749177	788782410
Chr2A	495	chr2A	440	scaffold7387	267397828	286663339	+	19265512	788782410
Chr2A	496	chr2A	441	scaffold58925	286678010	292992484	+	6314475	788782410
Chr2A	497	chr2A	442	scaffold152166	293015953	300113818	-	7097866	788782410
Chr2A	498	chr2A	443	scaffold97007	300114819	309900997	+	9786179	788782410
Chr2A	499	chr2A	444	scaffold130132	309901998	316395242	-	6493245	788782410
Chr2A	500	chr2A	445	scaffold71243	316399804	329641907	-	13242104	788782410
Chr2A	501	chr2A	446	scaffold139461-3	329649998	330693126	-	1043129	788782410
Chr2A	502	chr2A	447	scaffold24611	330948093	335558674	-	4610582	788782410
Chr2A	503	chr2A	448	scaffold14310	335702407	341123230	-	5420824	788782410
Chr2A	504	chr2A	449	scaffold37440	341153455	350557886	-	9404432	788782410
Chr2A	505	chr2A	450	scaffold88188	350816115	354151159	-	3335045	788782410
Chr2A	506	chr2A	451	scaffold87721	354159488	357322678	-	3163191	788782410
Chr2A	507	chr2A	452	scaffold83805	357335731	358304316	+	968586	788782410
Chr2A	508	chr2A	453	scaffold50638-2	358319493	367454780	+	9135288	788782410
Chr2A	509	chr2A	454	scaffold76746	367455781	367790989	+	335209	788782410
Chr2A	510	chr2A	455	scaffold95744	367791990	368416702	-	624713	788782410
Chr2A	511	chr2A	456	scaffold69433	368417703	368759200	+	341498	788782410
Chr2A	512	chr2A	457	scaffold16838	368760201	371311547	-	2551347	788782410
Chr2A	513	chr2A	458	scaffold6942	371314488	376148961	+	4834474	788782410
Chr2A	514	chr2A	459	scaffold13537	376201989	377731608	+	1529620	788782410
Chr2A	515	chr2A	460	scaffold45293	377734697	379149872	-	1415176	788782410
Chr2A	516	chr2A	461	scaffold38346	379357206	387352074	+	7994869	788782410
Chr2A	517	chr2A	462	scaffold136858	387469321	395124436	-	7655116	788782410
Chr2A	518	chr2A	463	scaffold19202	395201045	397556410	-	2355366	788782410
Chr2A	519	chr2A	464	scaffold94620	397571381	402249405	+	4678025	788782410
Chr2A	520	chr2A	465	scaffold102898	402309908	413796784	-	11486877	788782410
Chr2A	521	chr2A	466	scaffold91585	413801953	416530696	+	2728744	788782410
Chr2A	522	chr2A	467	scaffold77191	416574092	421213571	-	4639480	788782410
Chr2A	523	chr2A	468	scaffold77192	421226901	432251754	+	11024854	788782410
Chr2A	524	chr2A	432	scaffold1969	432683124	434106805	-	1423682	788782410
Chr2A	525	chr2A	433	scaffold41945	434114470	441393093	-	7278624	788782410
Chr2A	526	chrUn		scaffold112263	441394094	441503679	+	109586	788782410
Chr2A	527	chr2A	469	scaffold75395	441506707	459631216	-	18124510	788782410
Chr2A	528	chr2A	470	scaffold54554	459631716	461702783	-	2071068	788782410
Chr2A	529	chr2A	471	scaffold56379	461763990	464609899	-	2845910	788782410
Chr2A	530	chr2A	472	scaffold99674-3	464614840	466272492	+	1657653	788782410
Chr2A	531	chr2A	473	scaffold75433-1	466278500	470079267	+	3800768	788782410
Chr2A	532	chr2A	474	scaffold26649-1	470162594	489348490	-	19185897	788782410
Chr2A	533	chr2A	475	scaffold131702	489353784	493841939	-	4488156	788782410
Chr2A	534	chr2A	476	scaffold100075	493846694	494925003	+	1078310	788782410
Chr2A	535	chr2A	477	scaffold49495	495150144	501570895	+	6420752	788782410
Chr2A	536	chr2A	478	scaffold83432	501601326	515966996	+	14365671	788782410
Chr2A	537	chr2A	479	scaffold16644	515974112	545406931	-	29432820	788782410
Chr2A	538	chr2A	480	scaffold138386	545411143	569549560	+	24138418	788782410
Chr2A	539	chrUn		scaffold3110	569550561	569654080	-	103520	788782410
Chr2A	540	chr2A	481	scaffold24554	569775698	572067909	-	2292212	788782410
Chr2A	541	chr2A	482	scaffold24555	572072767	585844601	+	13771835	788782410
Chr2A	542	chr2A	483	scaffold98677	585861926	588746882	+	2884957	788782410
Chr2A	543	chr2A	484	scaffold88045-2	588751805	596706713	+	7954909	788782410
Chr2A	544	chrUn		scaffold144529	596715805	596814630	-	98826	788782410
Chr2A	545	chr2A	485	scaffold126325	597012254	606303087	-	9290834	788782410
Chr2A	546	chr2A	486	scaffold87845	606460369	613786651	-	7326283	788782410
Chr2A	547	chr2A	487	scaffold89431	613981497	614657472	-	675976	788782410
Chr2A	548	chr2A	488	scaffold19110	614658473	637012690	-	22354218	788782410
Chr2A	549	chr2A	489	scaffold57175	637013189	637737227	-	724039	788782410
Chr2A	550	chr2A	490	scaffold572	637737727	639794941	+	2057215	788782410
Chr2A	551	chr2A	491	scaffold20281	639810548	654811711	-	15001164	788782410
Chr2A	552	chrUn		scaffold95057	655342759	655387063	-	44305	788782410
Chr2A	553	chr2A	492	scaffold87661	655487857	656986754	-	1498898	788782410
Chr2A	554	chr2A	493	scaffold32781	656987254	664098942	+	7111689	788782410
Chr2A	555	chrUn		scaffold12251	664113479	664322601	-	209123	788782410
Chr2A	556	chr2A	494	scaffold160832	664359416	677094139	-	12734724	788782410
Chr2A	557	chr2A	495	scaffold53731	677150593	699677507	+	22526915	788782410
Chr2A	558	chr2A	496	scaffold67346-1	699730830	707044787	-	7313958	788782410
Chr2A	559	chr2A	497	scaffold8305	707068740	716755751	-	9687012	788782410
Chr2A	560	chr2A	498	scaffold130461	716790073	717507725	+	717653	788782410
Chr2A	561	chr2A	499	scaffold58822	717512150	727458796	+	9946647	788782410
Chr2A	562	chr2A	500	scaffold97626	727468527	728926890	+	1458364	788782410
Chr2A	563	chr2A	501	scaffold66596	728947693	736353942	+	7406250	788782410
Chr2A	564	chr2A	502	scaffold29374	736517571	739819129	+	3301559	788782410
Chr2A	565	chr2A	503	scaffold1822	739939454	743084196	+	3144743	788782410
Chr2A	566	chr2A	504	scaffold128695	743177009	748872783	-	5695775	788782410
Chr2A	567	chr2A	505	scaffold31729	748873283	753009343	-	4136061	788782410
Chr2A	568	chr2A	506	scaffold67963	753046932	753934089	+	887158	788782410
Chr2A	569	chr2A	507	scaffold87092	754134136	754460234	+	326099	788782410
Chr2A	570	chrUn		scaffold18213	754540779	754789639	-	248861	788782410
Chr2A	571	chr2A	508	scaffold71698	754942187	757478307	+	2536121	788782410
Chr2A	572	chr2A	509	scaffold28960	757605262	760388377	+	2783116	788782410
Chr2A	573	chr2A	510	scaffold46842	760450055	761086395	-	636341	788782410
Chr2A	574	chr2A	511	scaffold66452	761102587	762145203	-	1042617	788782410
Chr2A	575	chr2A	512	scaffold85343	762320327	762641613	+	321287	788782410
Chr2A	576	chrUn		scaffold118434	762652095	762765225	-	113131	788782410
Chr2A	577	chr2A	513	scaffold33363	762797440	763108097	+	310658	788782410
Chr2A	578	chr2A	514	scaffold142940	763237006	764252186	-	1015181	788782410
Chr2A	579	chr2A	515	scaffold110486	764373037	767416279	-	3043243	788782410
Chr2A	580	chr2A	516	scaffold54497	767421913	767911119	+	489207	788782410
Chr2A	581	chr2A	517	scaffold75432	767921762	768533037	-	611276	788782410
Chr2A	582	chr2A	518	scaffold20408	768546299	769466461	+	920163	788782410
Chr2A	583	chr2A	519	scaffold35322	769467462	770533815	-	1066354	788782410
Chr2A	584	chr2A	520	scaffold39623	770606190	771233609	-	627420	788782410
Chr2A	585	chrUn		scaffold38050	771256401	771534228	-	277828	788782410
Chr2A	586	chr2A	521	scaffold3547	771679416	778031241	+	6351826	788782410
Chr2A	587	chr2A	522	scaffold44988	778279687	780643785	+	2364099	788782410
Chr2A	588	chr2A	523	scaffold142822-2	780732000	783834946	+	3102947	788782410
Chr2A	589	chr2A	526	scaffold63365	784130933	786339264	-	2208332	788782410
Chr2A	590	chr2A	525	scaffold27566	786413236	787253707	+	840472	788782410
Chr2A	591	chr2A	524	scaffold21537	787258529	788782410	+	1523882	788782410
Chr2B	592	chr2B	527	scaffold30875	1	2071777	+	2071777	825750385
Chr2B	593	chrUn		scaffold104569	2072778	2402620	-	329843	825750385
Chr2B	594	chrUn		scaffold22268	2453849	2606668	-	152820	825750385
Chr2B	595	chr2B	528	scaffold64112	2671353	3183550	-	512198	825750385
Chr2B	596	chrUn		scaffold97889	3263820	3369960	+	106141	825750385
Chr2B	597	chrUn		scaffold101910	3419917	3501023	+	81107	825750385
Chr2B	598	chrUn		scaffold22894	3501124	3628195	-	127072	825750385
Chr2B	599	chrUn		scaffold81157	3669098	3803389	+	134292	825750385
Chr2B	600	chr2B	529	scaffold106077	4077975	5060650	+	982676	825750385
Chr2B	601	chr2B	530	scaffold19264	5147693	5739206	+	591514	825750385
Chr2B	602	chrUn		scaffold58511	5887811	6019600	-	131790	825750385
Chr2B	603	chr2B	531	scaffold43668	6044994	8857449	+	2812456	825750385
Chr2B	604	chr2B	532	scaffold67964	9181402	9819014	-	637613	825750385
Chr2B	605	chr2B	533	scaffold27092	9932525	11237966	+	1305442	825750385
Chr2B	606	chr2B	534	scaffold4087	11238967	12351857	-	1112891	825750385
Chr2B	607	chr2B	535	scaffold20866	12352858	14022748	+	1669891	825750385
Chr2B	608	chr2B	536	scaffold77456	14097096	14575098	-	478003	825750385
Chr2B	609	chr2B	537	scaffold65448	14946346	16159360	-	1213015	825750385
Chr2B	610	chr2B	538	scaffold17783	16339258	17497406	+	1158149	825750385
Chr2B	611	chr2B	539	scaffold22773	17583754	21855543	-	4271790	825750385
Chr2B	612	chr2B	540	scaffold8446	21931236	22873303	+	942068	825750385
Chr2B	613	chr2B	541	scaffold6268	22906496	23420793	-	514298	825750385
Chr2B	614	chr2B	542	scaffold129620	23457106	25966574	-	2509469	825750385
Chr2B	615	chrUn		scaffold32741	25967575	26075646	+	108072	825750385
Chr2B	616	chr2B	543	scaffold35148	26075747	26650877	-	575131	825750385
Chr2B	617	chrUn		scaffold57227	27073399	27250008	-	176610	825750385
Chr2B	618	chr2B	544	scaffold17732	27438135	29526981	-	2088847	825750385
Chr2B	619	chrUn		scaffold88543	29714396	29863361	-	148966	825750385
Chr2B	620	chr2B	545	scaffold115654	29864362	30856844	+	992483	825750385
Chr2B	621	chr2B	546	scaffold51549	30928844	31504169	+	575326	825750385
Chr2B	622	chr2B	547	scaffold95346	31505170	32459791	-	954622	825750385
Chr2B	623	chr2B	548	scaffold69473	32708473	33397729	-	689257	825750385
Chr2B	624	chr2B	549	scaffold10972	33398229	34642426	+	1244198	825750385
Chr2B	625	chrUn		scaffold35514	34680800	34958737	-	277938	825750385
Chr2B	626	chrUn		scaffold87758	34986972	35235418	-	248447	825750385
Chr2B	627	chrUn		scaffold1479	35237020	35423681	-	186662	825750385
Chr2B	628	chr2B	550	scaffold25119	35898360	36236877	+	338518	825750385
Chr2B	629	chr2B	551	scaffold123862	36258942	36758540	+	499599	825750385
Chr2B	630	chr2B	552	scaffold113658	36868886	37745181	+	876296	825750385
Chr2B	631	chr2B	553	scaffold22654	37746182	38161462	-	415281	825750385
Chr2B	632	chr2B	554	scaffold18489	38187225	38922952	+	735728	825750385
Chr2B	633	chr2B	555	scaffold52351	39443749	40556230	-	1112482	825750385
Chr2B	634	chr2B	556	scaffold38592	40721091	41842633	+	1121543	825750385
Chr2B	635	chrUn		scaffold104538	41898427	42126958	+	228532	825750385
Chr2B	636	chrUn		scaffold119480	42127959	42430701	+	302743	825750385
Chr2B	637	chr2B	557	scaffold22053	42734365	43353419	+	619055	825750385
Chr2B	638	chr2B	558	scaffold64244	43392744	44549054	+	1156311	825750385
Chr2B	639	chr2B	559	scaffold75673	44643418	46715550	+	2072133	825750385
Chr2B	640	chr2B	560	scaffold44875	46747830	47271909	+	524080	825750385
Chr2B	641	chr2B	561	scaffold53538_r1	47371974	48233245	+	861272	825750385
Chr2B	642	chr2B	562	scaffold101084	48233345	49746889	-	1513545	825750385
Chr2B	643	chr2B	563	scaffold100140	49769971	52185629	-	2415659	825750385
Chr2B	644	chr2B	564	scaffold137732	52208775	52964676	+	755902	825750385
Chr2B	645	chrUn		scaffold5855-1	52965677	53210708	+	245032	825750385
Chr2B	646	chr2B	561	scaffold53538_r2	53446273	54106212	+	659940	825750385
Chr2B	647	chr2B	565	scaffold21933	54107212	55950466	-	1843255	825750385
Chr2B	648	chrUn		scaffold72738	56238268	56394473	-	156206	825750385
Chr2B	649	chr2B	566	scaffold45307	56460799	59154039	-	2693241	825750385
Chr2B	650	chrUn		scaffold107335	59175690	59323958	-	148269	825750385
Chr2B	651	chr2B	567	scaffold54744-1	59358613	59985340	+	626728	825750385
Chr2B	652	chr2B	568	scaffold86817	59986341	61200832	-	1214492	825750385
Chr2B	653	chr2B	569	scaffold749	61226464	64833434	+	3606971	825750385
Chr2B	654	chr2B	570	scaffold104469-1	64887277	68479826	+	3592550	825750385
Chr2B	655	chr2B	571	scaffold8556-1	68501456	74544984	-	6043529	825750385
Chr2B	656	chr2B	572	scaffold21871	74643236	77028281	+	2385046	825750385
Chr2B	657	chr2B	573	scaffold58410	77059963	77829350	-	769388	825750385
Chr2B	658	chr2B	574	scaffold76103	77853641	80342875	+	2489235	825750385
Chr2B	659	chrUn		scaffold1469	80361851	80650425	-	288575	825750385
Chr2B	660	chr2B	575	scaffold91596	80655380	81318959	-	663580	825750385
Chr2B	661	chr2B	576	scaffold15937	81319759	82856392	+	1536634	825750385
Chr2B	662	chr2B	577	scaffold44004	82963135	84169887	-	1206753	825750385
Chr2B	663	chr2B	578	scaffold4748	84198587	90729757	+	6531171	825750385
Chr2B	664	chr2B	579	scaffold45855	90739419	94026012	+	3286594	825750385
Chr2B	665	chr2B	580	scaffold32758-2	94301424	94869548	-	568125	825750385
Chr2B	666	chr2B	581	scaffold34879	94883220	96093987	-	1210768	825750385
Chr2B	667	chr2B	582	scaffold93797	96368489	98667927	+	2299439	825750385
Chr2B	668	chr2B	583	scaffold105257	98677042	100222784	+	1545743	825750385
Chr2B	669	chr2B	584	scaffold58986-2	100238195	100667814	+	429620	825750385
Chr2B	670	chr2B	585	scaffold18249	100714492	101378896	-	664405	825750385
Chr2B	671	chr2B	586	scaffold22435	101404650	102266576	-	861927	825750385
Chr2B	672	chr2B	587	scaffold50512	102282049	105823557	-	3541509	825750385
Chr2B	673	chrUn		scaffold53687	105831955	105970406	+	138452	825750385
Chr2B	674	chr2B	588	scaffold123346-1	105971282	107597678	-	1626397	825750385
Chr2B	675	chr2B	589	scaffold112178	107629927	108090993	+	461067	825750385
Chr2B	676	chr2B	590	scaffold8270	108096819	110630955	+	2534137	825750385
Chr2B	677	chr2B	591	scaffold1898	110651827	111897063	+	1245237	825750385
Chr2B	678	chrUn		scaffold7713	111916688	111996970	-	80283	825750385
Chr2B	679	chr2B	592	scaffold21863	112040693	112519542	-	478850	825750385
Chr2B	680	chr2B	593	scaffold33804	112520542	113771133	+	1250592	825750385
Chr2B	681	chr2B	594	scaffold121074	113824133	117417615	-	3593483	825750385
Chr2B	682	chr2B	595	scaffold33274	117417716	118471651	-	1053936	825750385
Chr2B	683	chr2B	596	scaffold47793	118478940	119549359	-	1070420	825750385
Chr2B	684	chr2B	597	scaffold66015	119577818	124267919	-	4690102	825750385
Chr2B	685	chr2B	598	scaffold115176	124468818	132463659	-	7994842	825750385
Chr2B	686	chr2B	599	scaffold13390	132516111	133544859	+	1028749	825750385
Chr2B	687	chr2B	600	scaffold12814	133566414	133840626	+	274213	825750385
Chr2B	688	chr2B	601	scaffold7576	133923120	135633557	+	1710438	825750385
Chr2B	689	chr2B	602	scaffold83829	135736068	137414702	-	1678635	825750385
Chr2B	690	chr2B	603	scaffold15859	137420476	139520778	+	2100303	825750385
Chr2B	691	chr2B	604	scaffold85534	139563797	147814703	-	8250907	825750385
Chr2B	692	chr2B	605	scaffold120413	147823459	152925889	+	5102431	825750385
Chr2B	693	chr2B	606	scaffold66685	153202038	157751532	-	4549495	825750385
Chr2B	694	chr2B	607	scaffold76362	157803900	165265208	+	7461309	825750385
Chr2B	695	chrUn		scaffold81386	165365795	165493980	+	128186	825750385
Chr2B	696	chr2B	608	scaffold138497	165495627	166087092	+	591466	825750385
Chr2B	697	chr2B	609	scaffold6310	166177811	180209184	+	14031374	825750385
Chr2B	698	chr2B	610	scaffold40823	180381916	184183961	-	3802046	825750385
Chr2B	699	chrUn		scaffold14203	184231587	184409855	+	178269	825750385
Chr2B	700	chr2B	611	scaffold89270	184617359	191812612	-	7195254	825750385
Chr2B	701	chr2B	612	scaffold104713_r1	191817329	192855593	+	1038265	825750385
Chr2B	702	chr2B	613	scaffold49645	192891982	199902385	+	7010404	825750385
Chr2B	703	chr2B	614	scaffold58347	200009918	202321474	-	2311557	825750385
Chr2B	704	chr2B	615	scaffold28738	202357591	202725379	+	367789	825750385
Chr2B	705	chr2B	616	scaffold91899	202725480	204316406	-	1590927	825750385
Chr2B	706	chr2B	617	scaffold31082-2	204328567	219023446	-	14694880	825750385
Chr2B	707	chr2B	618	scaffold43810	219028497	227820565	+	8792069	825750385
Chr2B	708	chr2B	619	scaffold8108-1	228102351	229534871	+	1432521	825750385
Chr2B	709	chr2B	620	scaffold8108-3	229565018	234137496	+	4572479	825750385
Chr2B	710	chr2B	621	scaffold130201	234208577	237081146	-	2872570	825750385
Chr2B	711	chr2B	622	scaffold37731	237089166	246675869	-	9586704	825750385
Chr2B	712	chr2B	623	scaffold26615	246676995	260566594	+	13889600	825750385
Chr2B	713	chr2B	624	scaffold62906-1	260570320	271762324	+	11192005	825750385
Chr2B	714	chr2B	625	scaffold18531	271764209	279736932	+	7972724	825750385
Chr2B	715	chr2B	626	scaffold68634-2	279758246	289852932	-	10094687	825750385
Chr2B	716	chrUn		scaffold82521	289853933	289967917	-	113985	825750385
Chr2B	717	chr2B	612	scaffold104713_r2	289968017	290701410	+	733394	825750385
Chr2B	718	chr2B	630	scaffold17115_r1	290703625	305783415	-	15079791	825750385
Chr2B	719	chr2B	627	scaffold58446	305784416	309108420	-	3324005	825750385
Chr2B	720	chr2B	630	scaffold17115_r2	309108919	313773954	+	4665036	825750385
Chr2B	721	chr2B	629	scaffold48839	313774955	315548523	+	1773569	825750385
Chr2B	722	chr2B	628	scaffold72699	315549023	315958629	+	409607	825750385
Chr2B	723	chr2B	631	scaffold8306-1	315959630	319282438	+	3322809	825750385
Chr2B	724	chr2B	632	scaffold4134	319283439	320360266	+	1076828	825750385
Chr2B	725	chr2B	633	scaffold117755	320373559	321960406	+	1586848	825750385
Chr2B	726	chr2B	634	scaffold64508	321971228	324122842	-	2151615	825750385
Chr2B	727	chr2B	635	scaffold58241	324123342	324525562	+	402221	825750385
Chr2B	728	chr2B	636	scaffold110437	324526563	324981932	+	455370	825750385
Chr2B	729	chr2B	637	scaffold70969-2	325218826	335246682	-	10027857	825750385
Chr2B	730	chr2B	638	scaffold62386-2	335267949	337740519	+	2472571	825750385
Chr2B	731	chr2B	639	scaffold24763-2	337741520	344439750	+	6698231	825750385
Chr2B	732	chr2B	640	scaffold16407	344466073	349575724	+	5144973	825750385
Chr2B	733	chr2B	641	scaffold29080	349617315	350719334	+	1102020	825750385
Chr2B	734	chr2B	644	scaffold123143	350720335	353147754	+	2427420	825750385
Chr2B	735	chr2B	643	scaffold43616_r2	353194510	357095821	+	3901312	825750385
Chr2B	736	chr2B	642	scaffold11820	357101841	361134752	+	4032912	825750385
Chr2B	737	chr2B	643	scaffold43616_r1	361135753	363147619	+	2011867	825750385
Chr2B	738	chr2B	645	scaffold25165	363148619	365377050	-	2228432	825750385
Chr2B	739	chr2B	646	scaffold77470	365377151	366792757	-	1415607	825750385
Chr2B	740	chr2B	647	scaffold79150	366793758	367525344	-	731587	825750385
Chr2B	741	chr2B	648	scaffold75103	367526345	368037960	+	511616	825750385
Chr2B	742	chr2B	649	scaffold1148	368038961	369276365	+	1237405	825750385
Chr2B	743	chr2B	650	scaffold69009	369277366	369776578	+	499213	825750385
Chr2B	744	chr2B	651	scaffold23819	369777579	370612365	-	834787	825750385
Chr2B	745	chr2B	652	scaffold57169	370613366	370968231	+	354866	825750385
Chr2B	746	chr2B	653	scaffold26277	370969232	373274775	+	2305544	825750385
Chr2B	747	chr2B	654	scaffold67648	373288950	384824972	-	11536023	825750385
Chr2B	748	chr2B	655	scaffold75433-3	384863467	388466198	+	3602732	825750385
Chr2B	749	chr2B	656	scaffold43383	388472068	393595542	+	5123475	825750385
Chr2B	750	chr2B	657	scaffold79069	393596543	395393589	-	1797047	825750385
Chr2B	751	chr2B	658	scaffold95487-5	395445082	399791125	+	4346044	825750385
Chr2B	752	chr2B	659	scaffold48636	399797222	420835502	+	21038281	825750385
Chr2B	753	chr2B	660	scaffold5820	420871133	428738579	-	7867447	825750385
Chr2B	754	chr2B	661	scaffold57403	428758264	429456688	+	698425	825750385
Chr2B	755	chr2B	662	scaffold38923	429471064	434210434	-	4739371	825750385
Chr2B	756	chr2B	663	scaffold88885	434218892	435236805	+	1017914	825750385
Chr2B	757	chr2B	664	scaffold57650	435315256	442831130	-	7515875	825750385
Chr2B	758	chr2B	665	scaffold48870	442832131	445463006	-	2630876	825750385
Chr2B	759	chr2B	666	scaffold101372	445484230	448718398	+	3234169	825750385
Chr2B	760	chr2B	667	scaffold87601-2	448729780	452424027	-	3694248	825750385
Chr2B	761	chr6A	2020	scaffold87601-1_r2	452424569	453008838	-	584270	825750385
Chr2B	762	chr2B	668	scaffold87812-1	453009337	463022002	+	10012666	825750385
Chr2B	763	chr3B	951	scaffold79340_r1	463058853	464334929	-	1276077	825750385
Chr2B	764	chr2B	669	scaffold84291	464375989	468355433	-	3979445	825750385
Chr2B	765	chr2B	670	scaffold60495	468370193	470651964	+	2281772	825750385
Chr2B	766	chr2B	671	scaffold164-2	470660707	494508898	-	23848192	825750385
Chr2B	767	chr2B	672	scaffold487	494653102	502043187	-	7390086	825750385
Chr2B	768	chr2B	673	scaffold125702	502065632	503506046	+	1440415	825750385
Chr2B	769	chr2B	674	scaffold25507	503558326	512054258	-	8495933	825750385
Chr2B	770	chr2B	675	scaffold124633	512069928	520679370	+	8609443	825750385
Chr2B	771	chr2B	676	scaffold30894	520691725	534139623	+	13447899	825750385
Chr2B	772	chr2B	677	scaffold35252	534144096	541450536	+	7306441	825750385
Chr2B	773	chr2B	678	scaffold21552	541500784	560789969	-	19289186	825750385
Chr2B	774	chr2B	679	scaffold36049	560908457	562903474	-	1995018	825750385
Chr2B	775	chr2B	680	scaffold80201	562937688	566021509	-	3083822	825750385
Chr2B	776	chr2B	681	scaffold6894	566030274	574838213	+	8807940	825750385
Chr2B	777	chr2B	682	scaffold50363	574842689	577259288	+	2416600	825750385
Chr2B	778	chr2B	683	scaffold87516	577288113	577978270	-	690158	825750385
Chr2B	779	chr2B	684	scaffold9130	577979271	582716284	-	4737014	825750385
Chr2B	780	chr2B	685	scaffold85454	582719097	583951567	+	1232471	825750385
Chr2B	781	chr2B	686	scaffold42168	583955420	589302977	+	5347558	825750385
Chr2B	782	chr2B	687	scaffold32872	589303477	595449145	+	6145669	825750385
Chr2B	783	chr2B	688	scaffold58223	595450146	596603997	+	1153852	825750385
Chr2B	784	chr2B	689	scaffold113201	596621098	603497708	+	6876611	825750385
Chr2B	785	chr2B	690	scaffold43802	603500674	629872987	-	26372314	825750385
Chr2B	786	chr2B	691	scaffold17119	629953710	634048262	+	4094553	825750385
Chr2B	787	chr2B	692	scaffold74675	634217795	635269336	-	1051542	825750385
Chr2B	788	chr2B	693	scaffold76181	635433923	638147864	-	2713942	825750385
Chr2B	789	chr2B	694	scaffold21255	638150548	641385578	+	3235031	825750385
Chr2B	790	chr2B	695	scaffold33572	641401041	651906176	-	10505136	825750385
Chr2B	791	chr2B	696	scaffold70815	651906350	676951661	-	25045312	825750385
Chr2B	792	chr2B	697	scaffold96827	676955401	677248565	-	293165	825750385
Chr2B	793	chr2B	698	scaffold141056	677256127	679405808	+	2149682	825750385
Chr2B	794	chr2B	699	scaffold43368	679415287	682474370	+	3059084	825750385
Chr2B	795	chr2B	700	scaffold20344	682539909	685806495	-	3266587	825750385
Chr2B	796	chr2B	701	scaffold48529	685817415	692148921	+	6331507	825750385
Chr2B	797	chr2B	702	scaffold128035	692242443	696685020	+	4442578	825750385
Chr2B	798	chr2B	703	scaffold22015	696685520	697204293	+	518774	825750385
Chr2B	799	chr2B	704	scaffold140436	697249603	704137941	+	6888339	825750385
Chr2B	800	chr2B	705	scaffold139660	704151136	705321366	-	1170231	825750385
Chr2B	801	chrUn		scaffold81163	705444556	705669275	+	224720	825750385
Chr2B	802	chrUn		scaffold20370	705677242	705861607	+	184366	825750385
Chr2B	803	chr2B	706	scaffold39716	705886123	707187057	+	1300935	825750385
Chr2B	804	chrUn		scaffold94824	707640455	707971122	-	330668	825750385
Chr2B	805	chr2B	707	scaffold44682	708124223	717932041	+	9807819	825750385
Chr2B	806	chr2B	708	scaffold135798	718195121	719294125	-	1099005	825750385
Chr2B	807	chr2B	709	scaffold82723	719313988	722044471	+	2730484	825750385
Chr2B	808	chr2B	710	scaffold14534-1	722044971	725782045	-	3737075	825750385
Chr2B	809	chr2B	711	scaffold87544	725790336	731298813	-	5508478	825750385
Chr2B	810	chr2B	712	scaffold22799	731373314	736531020	+	5157707	825750385
Chr2B	811	chr2B	713	scaffold84046	736562622	739459382	-	2896761	825750385
Chr2B	812	chr2B	714	scaffold15186	739465521	742139736	-	2674216	825750385
Chr2B	813	chr2B	715	scaffold135658	742145865	747876098	+	5730234	825750385
Chr2B	814	chr2B	716	scaffold20043	747887070	754652724	-	6765655	825750385
Chr2B	815	chr2B	717	scaffold57310	754680801	758213142	+	3532342	825750385
Chr2B	816	chr2B	718	scaffold52345	758225834	765002276	-	6776443	825750385
Chr2B	817	chr2B	719	scaffold2740	765113677	769848195	+	4734519	825750385
Chr2B	818	chr2B	720	scaffold82115	769967473	770466950	-	499478	825750385
Chr2B	819	chr2B	721	scaffold14637	770478114	770991759	+	513646	825750385
Chr2B	820	chr2B	722	scaffold136655	771027552	771521473	-	493922	825750385
Chr2B	821	chr2B	723	scaffold66220	771541343	771939056	+	397714	825750385
Chr2B	822	chr2B	724	scaffold85125-1	772160255	775832301	-	3672047	825750385
Chr2B	823	chr2B	725	scaffold145989	775968347	780224679	+	4256333	825750385
Chr2B	824	chrUn		scaffold28878	780251880	780451902	-	200023	825750385
Chr2B	825	chr2B	726	scaffold53431	780591021	783675872	-	3084852	825750385
Chr2B	826	chr2B	727	scaffold7703	783675889	785092959	+	1417071	825750385
Chr2B	827	chr2B	728	scaffold149658	785108211	786570430	+	1462220	825750385
Chr2B	828	chr2B	729	scaffold28024	786761655	788239496	-	1477842	825750385
Chr2B	829	chr2B	730	scaffold59679	788290919	789120907	+	829989	825750385
Chr2B	830	chr2B	731	scaffold28215	789127960	789659363	-	531404	825750385
Chr2B	831	chr2B	732	scaffold33072	789700564	791180764	-	1480201	825750385
Chr2B	832	chr2B	733	scaffold9497	791223429	791822742	-	599314	825750385
Chr2B	833	chr2B	734	scaffold7885	792020693	797249980	+	5229288	825750385
Chr2B	834	chr2B	735	scaffold6973	797268723	800722209	+	3453487	825750385
Chr2B	835	chrUn		scaffold106325	800906622	801125019	-	218398	825750385
Chr2B	836	chr2B	736	scaffold103636	801247551	803565186	-	2317636	825750385
Chr2B	837	chr2B	737	scaffold40028	803622847	804623021	+	1000175	825750385
Chr2B	838	chr2B	738	scaffold100627	804737003	806399609	+	1662607	825750385
Chr2B	839	chr2B	739	scaffold560	806409134	807131665	-	722532	825750385
Chr2B	840	chr2B	740	scaffold15584	807218636	809898462	+	2679827	825750385
Chr2B	841	chr2B	741	scaffold104888	809965157	811487191	+	1522035	825750385
Chr2B	842	chr2B	742	scaffold6014	811539354	818004768	-	6465415	825750385
Chr2B	843	chr2B	743	scaffold47486	818005769	820164444	-	2158676	825750385
Chr2B	844	chr2B	744	scaffold20532-1	820311931	821003472	+	691542	825750385
Chr2B	845	chrUn		scaffold79148	821069767	821269465	+	199699	825750385
Chr2B	846	chr2B	745	scaffold33134	821352940	825750385	-	4397446	825750385
Chr3A	847	chr3A	755	scaffold19386	1	1450388	-	1450388	767616973
Chr3A	848	chr3A	754	scaffold38308	1551496	1871590	-	320095	767616973
Chr3A	849	chr3A	753	scaffold39908	2009350	2503806	+	494457	767616973
Chr3A	850	chr3A	752	scaffold37608	2503907	2972160	-	468254	767616973
Chr3A	851	chr3A	751	scaffold81855_r2	2997087	4928442	-	1931356	767616973
Chr3A	852	chr3A	751	scaffold81855_r1	4929442	8319169	-	3389728	767616973
Chr3A	853	chr3A	750	scaffold46747	8355233	8708372	-	353140	767616973
Chr3A	854	chr3A	749	scaffold30848	8851208	9920435	+	1069228	767616973
Chr3A	855	chrUn		scaffold2615	9960752	10136761	+	176010	767616973
Chr3A	856	chr3A	748	scaffold18993	10144171	14348607	+	4204437	767616973
Chr3A	857	chr3A	746	scaffold108118	14355501	14655071	+	299571	767616973
Chr3A	858	chr3A	747	scaffold55091	14670178	16385799	+	1715622	767616973
Chr3A	859	chr3A	756	scaffold95274-7	16485867	18682651	-	2196785	767616973
Chr3A	860	chr3A	757	scaffold132297	18709320	19202722	+	493403	767616973
Chr3A	861	chr3A	758	scaffold51193	19288610	20459376	-	1170767	767616973
Chr3A	862	chr3A	759	scaffold20890	20473235	21222046	-	748812	767616973
Chr3A	863	chr3A	760	scaffold104907-1	21263385	22518888	+	1255504	767616973
Chr3A	864	chr3A	761	scaffold40559	22534292	23171187	+	636896	767616973
Chr3A	865	chr3A	762	scaffold28005	23221395	25271675	-	2050281	767616973
Chr3A	866	chr3A	763	scaffold58231	25305075	26037656	-	732582	767616973
Chr3A	867	chr3A	764	scaffold22068	26098511	26652654	+	554144	767616973
Chr3A	868	chr3A	765	scaffold50837	26754833	28591337	+	1836505	767616973
Chr3A	869	chr3A	766	scaffold50755	28637908	29349919	-	712012	767616973
Chr3A	870	chr3A	767	scaffold124505	29400124	30371967	+	971844	767616973
Chr3A	871	chrUn		scaffold82400	30372577	30512049	-	139473	767616973
Chr3A	872	chr3A	768	scaffold20665	30550780	31995918	-	1445139	767616973
Chr3A	873	chr3A	769	scaffold153374	32093895	34154061	-	2060167	767616973
Chr3A	874	chr3A	770	scaffold82657-1	34387697	36959489	+	2571793	767616973
Chr3A	875	chr3A	771	scaffold77975	36967871	39842050	+	2874180	767616973
Chr3A	876	chr3A	772	scaffold126994	39881058	41082555	-	1201498	767616973
Chr3A	877	chrUn		scaffold80460	41082656	41290896	-	208241	767616973
Chr3A	878	chr3A	773	scaffold87239	41291879	42262037	-	970159	767616973
Chr3A	879	chr3A	774	scaffold68180	42324931	51590854	+	9265924	767616973
Chr3A	880	chr3A	775	scaffold8306-2	51598080	52925110	-	1327031	767616973
Chr3A	881	chr3A	776	scaffold18288	52926111	58308570	+	5382460	767616973
Chr3A	882	chrUn		scaffold9698	58343928	58509541	-	165614	767616973
Chr3A	883	chr3A	777	scaffold698-1	58536807	62201337	+	3664531	767616973
Chr3A	884	chr3A	778	scaffold698-3	62208390	64160773	+	1952384	767616973
Chr3A	885	chr3A	779	scaffold89904	64166073	75272219	+	11106147	767616973
Chr3A	886	chr3A	780	scaffold123373	75272719	86276432	+	11003714	767616973
Chr3A	887	chr3A	781	scaffold90521	86276932	88175059	+	1898128	767616973
Chr3A	888	chr3A	782	scaffold11453	88184208	96629399	-	8445192	767616973
Chr3A	889	chr3A	783	scaffold44840	96635078	99110890	-	2475813	767616973
Chr3A	890	chr3A	784	scaffold56308	99112937	121301583	-	22188647	767616973
Chr3A	891	chr3A	785	scaffold31720	121321518	127016694	+	5695177	767616973
Chr3A	892	chr3A	786	scaffold127104	127023670	153921805	+	26898136	767616973
Chr3A	893	chr3A	787	scaffold72071-2	153922305	170934265	+	17011961	767616973
Chr3A	894	chr3A	788	scaffold63591	170938258	171614446	+	676189	767616973
Chr3A	895	chr3A	789	scaffold18817	171748243	175227120	-	3478878	767616973
Chr3A	896	chr3A	790	scaffold25357-3	175230665	176623353	+	1392689	767616973
Chr3A	897	chr3A	791	scaffold634	176647137	178735314	+	2088178	767616973
Chr3A	898	chr3A	792	scaffold110757	178803088	182093817	-	3290730	767616973
Chr3A	899	chr3A	793	scaffold112532	182095545	184376707	-	2281163	767616973
Chr3A	900	chr3A	794	scaffold58585	184382022	184693254	-	311233	767616973
Chr3A	901	chr3A	795	scaffold110036-1	184700850	186164201	-	1463352	767616973
Chr3A	902	chr3A	796	scaffold10749	186211239	196141625	-	9930387	767616973
Chr3A	903	chr3A	797	scaffold28563	196147073	221450627	-	25303555	767616973
Chr3A	904	chr3A	798	scaffold18502	221465683	227196653	-	5730971	767616973
Chr3A	905	chr3A	799	scaffold57796	227202304	233900788	+	6698485	767616973
Chr3A	906	chr3A	800	scaffold74224	233901789	235439743	+	1537955	767616973
Chr3A	907	chr3A	801	scaffold21403	235450819	239054693	-	3603875	767616973
Chr3A	908	chr3A	802	scaffold126231	239063788	257687313	-	18623526	767616973
Chr3A	909	chr3A	803	scaffold18529-1	257687813	260619786	-	2931974	767616973
Chr3A	910	chr3A	804	scaffold52494	260629030	266484030	-	5855001	767616973
Chr3A	911	chr3A	805	scaffold20764	266495351	268022326	+	1526976	767616973
Chr3A	912	chr3A	806	scaffold122443	268037896	269789030	+	1751135	767616973
Chr3A	913	chr3A	807	scaffold32383	269790031	275713934	-	5923904	767616973
Chr3A	914	chr3A	808	scaffold64996	275717636	289280024	+	13562389	767616973
Chr3A	915	chr3A	809	scaffold145119	289283745	299115199	-	9831455	767616973
Chr3A	916	chr3A	810	scaffold49043	299117707	304407520	-	5289814	767616973
Chr3A	917	chr3A	811	scaffold6149	304481617	313160703	+	8679087	767616973
Chr3A	918	chr3A	812	scaffold18165	313170614	322776305	-	9605692	767616973
Chr3A	919	chr3A	813	scaffold43893	322867510	323456057	+	588548	767616973
Chr3A	920	chr3A	814	scaffold4518	323460401	326736208	-	3275808	767616973
Chr3A	921	chr3A	815	scaffold76908	326744205	328099092	-	1354888	767616973
Chr3A	922	chr3A	816	scaffold68544	328100093	328481098	+	381006	767616973
Chr3A	923	chr3A	817	scaffold18424	328482099	328926750	+	444652	767616973
Chr3A	924	chr3A	818	scaffold93750	328927751	329376002	+	448252	767616973
Chr3A	925	chr3A	819	scaffold74549	329377003	329992075	+	615073	767616973
Chr3A	926	chr3A	820	scaffold125821	329993076	331617322	-	1624247	767616973
Chr3A	927	chr3A	821	scaffold144033	331617423	342514202	+	10896780	767616973
Chr3A	928	chr3A	822	scaffold66427	342526496	351557481	-	9030986	767616973
Chr3A	929	chr3A	823	scaffold37647	351566626	359820496	-	8253871	767616973
Chr3A	930	chr3A	824	scaffold80996	359832747	361740753	-	1908007	767616973
Chr3A	931	chr3A	825	scaffold55849	361752440	370538541	-	8786102	767616973
Chr3A	932	chr3A	826	scaffold96952	370550008	371209335	-	659328	767616973
Chr3A	933	chr3A	827	scaffold16115	371215064	371570081	+	355018	767616973
Chr3A	934	chr3A	828	scaffold37786	371626474	372893854	-	1267381	767616973
Chr3A	935	chr3A	829	scaffold51-4	372901259	394278072	-	21376814	767616973
Chr3A	936	chr3A	830	scaffold69142	394285770	395122254	-	836485	767616973
Chr3A	937	chr3A	831	scaffold19566	395166671	417479031	+	22312361	767616973
Chr3A	938	chr3A	832	scaffold46334	417600233	422874344	+	5274112	767616973
Chr3A	939	chr3A	833	scaffold42835	422876204	442443278	+	19567075	767616973
Chr3A	940	chr3A	834	scaffold54620	442556557	464556813	+	22000257	767616973
Chr3A	941	chr3A	835	scaffold30430-1_r1	464574062	465024212	+	450151	767616973
Chr3A	942	chr3A	836	scaffold30430-3	465024899	468207764	+	3182866	767616973
Chr3A	943	chr3A	837	scaffold101725	468342006	472015697	+	3673692	767616973
Chr3A	944	chr3A	838	scaffold111524	472033499	489924319	-	17890821	767616973
Chr3A	945	chr3A	839	scaffold91157	490054880	490455953	+	401074	767616973
Chr3A	946	chr3A	840	scaffold30954	490466084	524446497	-	33980414	767616973
Chr3A	947	chr3A	841	scaffold551	524472749	533554000	+	9081252	767616973
Chr3A	948	chr3A	842	scaffold15990	533565794	542057825	-	8492032	767616973
Chr3A	949	chr3A	843	scaffold104948	542080692	550164020	+	8083329	767616973
Chr3A	950	chr3A	844	scaffold85251	550164520	552487126	+	2322607	767616973
Chr3A	951	chr3A	845	scaffold15500	552494353	552790541	-	296189	767616973
Chr3A	952	chr3A	846	scaffold11946	552806874	556010740	+	3203867	767616973
Chr3A	953	chr3A	847	scaffold28270	556011741	560576111	-	4564371	767616973
Chr3A	954	chr3A	848	scaffold6281-2	560580584	564019633	-	3439050	767616973
Chr3A	955	chr3A	849	scaffold29502	564020028	568802398	+	4782371	767616973
Chr3A	956	chr3A	850	scaffold44341	568803904	571494786	+	2690883	767616973
Chr3A	957	chr3A	851	scaffold34151	571674367	576231831	+	4557465	767616973
Chr3A	958	chr3A	852	scaffold5848	576245082	581709714	+	5464633	767616973
Chr3A	959	chr3A	853	scaffold53106	581726731	596781404	+	15054674	767616973
Chr3A	960	chr3A	854	scaffold123716	596790012	614656609	-	17866598	767616973
Chr3A	961	chr3A	855	scaffold1400	614666857	638485568	+	23818712	767616973
Chr3A	962	chr3A	856	scaffold21500	638496008	646790708	+	8294701	767616973
Chr3A	963	chr3A	857	scaffold84944	646991728	663103525	-	16111798	767616973
Chr3A	964	chr4B	1583	scaffold38583-1_r1	663117185	663423319	+	306135	767616973
Chr3A	965	chr3A	858	scaffold38583-2	663423724	672315111	+	8891388	767616973
Chr3A	966	chr3A	859	scaffold38583-5	672325792	686362860	+	14037069	767616973
Chr3A	967	chr3A	860	scaffold17754_r3	686502009	691348659	-	4846651	767616973
Chr3A	968	chr3A	860	scaffold17754_r1	691367316	692522047	-	1154732	767616973
Chr3A	969	chr3A	861	scaffold65828	692522547	693929624	-	1407078	767616973
Chr3A	970	chr3A	862	scaffold29093	694243171	696879028	+	2635858	767616973
Chr3A	971	chr3A	863	scaffold67127	696975207	699293764	-	2318558	767616973
Chr3A	972	chr3A	864	scaffold48281	699310299	699819071	-	508773	767616973
Chr3A	973	chr3A	865	scaffold36073	699820072	704383973	+	4563902	767616973
Chr3A	974	chr3A	867	scaffold20620	704833472	705235488	-	402017	767616973
Chr3A	975	chrUn		scaffold28843	705254054	705510825	+	256772	767616973
Chr3A	976	chr3A	866	scaffold5572	705527592	706016064	-	488473	767616973
Chr3A	977	chr3A	868	scaffold50705	706034996	711903986	-	5868991	767616973
Chr3A	978	chr3A	869	scaffold34885	712123926	713372420	+	1248495	767616973
Chr3A	979	chr3A	870	scaffold47361	713399058	714789861	+	1390804	767616973
Chr3A	980	chr3A	871	scaffold3914	714818875	715850422	-	1031548	767616973
Chr3A	981	chr3A	872	scaffold89719	715874830	718214949	-	2340120	767616973
Chr3A	982	chr3A	873	scaffold105646	718258873	721364087	-	3105215	767616973
Chr3A	983	chr3A	874	scaffold75281	721615045	723407339	-	1792295	767616973
Chr3A	984	chr3A	875	scaffold31794	723613384	725211188	+	1597805	767616973
Chr3A	985	chr3A	877	scaffold78826	725240537	728188781	+	2948245	767616973
Chr3A	986	chrUn		scaffold32174	728254073	728665804	+	411732	767616973
Chr3A	987	chr3A	878	scaffold162162	728691531	729087110	-	395580	767616973
Chr3A	988	chr3A	879	scaffold55690	729324733	730462447	-	1137715	767616973
Chr3A	989	chr3A	880	scaffold46315	730469399	731679261	+	1209863	767616973
Chr3A	990	chr3A	881	scaffold9452	731782152	732464249	+	682098	767616973
Chr3A	991	chr3A	882	scaffold34533	732671019	735062783	+	2391765	767616973
Chr3A	992	chr3A	883	scaffold18449	735094123	735763255	-	669133	767616973
Chr3A	993	chrUn		scaffold50264	735782674	736117575	+	334902	767616973
Chr3A	994	chrUn		scaffold109169	736117676	736299298	-	181623	767616973
Chr3A	995	chr3A	885	scaffold29163	739487481	739790338	+	302858	767616973
Chr3A	996	chrUn		scaffold6838	740034421	740366699	+	332279	767616973
Chr3A	997	chrUn		scaffold8060	740367700	740513766	-	146067	767616973
Chr3A	998	chr3A	887	scaffold90375	740514766	741080154	+	565389	767616973
Chr3A	999	chr3A	888	scaffold106317	741319596	742489605	-	1170010	767616973
Chr3A	1000	chrUn		scaffold81664	742502920	742823875	-	320956	767616973
Chr3A	1001	chr3A	889	scaffold125674	743150711	743889572	+	738862	767616973
Chr3A	1002	chr3A	890	scaffold71821	743891361	744451843	+	560483	767616973
Chr3A	1003	chrUn		scaffold66366	744566238	744837242	-	271005	767616973
Chr3A	1004	chr3A	891	scaffold126486	744839898	745422976	-	583079	767616973
Chr3A	1005	chr3A	892	scaffold20669	745604081	746545054	-	940974	767616973
Chr3A	1006	chr3A	893	scaffold20482	746584276	746976803	+	392528	767616973
Chr3A	1007	chr3A	894	scaffold87916	747071098	747525660	+	454563	767616973
Chr3A	1008	chrUn		scaffold58211	747588930	747764766	+	175837	767616973
Chr3A	1009	chr3A	895	scaffold104498	747815306	748872885	+	1057580	767616973
Chr3A	1010	chr3A	896	scaffold7518	748969323	749452720	+	483398	767616973
Chr3A	1011	chr3A	897	scaffold123914	749461611	750076325	-	614715	767616973
Chr3A	1012	chr3A	898	scaffold23074	750104220	751027800	-	923581	767616973
Chr3A	1013	chrUn		scaffold46436	751057632	751258599	+	200968	767616973
Chr3A	1014	chr3A	899	scaffold15801	751272915	753196512	+	1923598	767616973
Chr3A	1015	chr3A	900	scaffold33803	753550377	755106580	-	1556204	767616973
Chr3A	1016	chr3A	901	scaffold58574	755212874	756223648	-	1010775	767616973
Chr3A	1017	chr3A	902	scaffold32489	756238781	756789332	-	550552	767616973
Chr3A	1018	chr3A	903	scaffold34652	756895040	758732794	+	1837755	767616973
Chr3A	1019	chrUn		scaffold10053	758761788	758925695	+	163908	767616973
Chr3A	1020	chr3A	904	scaffold46419	759099564	759391597	+	292034	767616973
Chr3A	1021	chr3A	905	scaffold16771	759543172	760136109	+	592938	767616973
Chr3A	1022	chr3A	906	scaffold37916	760242834	760874762	+	631929	767616973
Chr3A	1023	chr3A	907	scaffold44323	760892102	762067547	-	1175446	767616973
Chr3A	1024	chr3A	908	scaffold29403	762207948	762642356	+	434409	767616973
Chr3A	1025	chr3A	909	scaffold64297	762664034	763124830	+	485708	767616973
Chr3A	1026	chr3A	910	scaffold147648	763172980	763800898	+	627919	767616973
Chr3A	1027	chr3A	911	scaffold8976	763953739	765078336	-	1124598	767616973
Chr3A	1028	chr3A	912	scaffold2444	765323322	765755574	+	432253	767616973
Chr3A	1029	chr3A	913	scaffold71000	765967854	767616973	-	1649120	767616973
Chr3B	1030	chr3B	916	scaffold3684	1	546132	+	546132	865950040
Chr3B	1031	chr3B	915	scaffold51765	643210	2061860	-	1418651	865950040
Chr3B	1032	chr3B	914	scaffold57722	2074004	2997409	+	942696	865950040
Chr3B	1033	chr3B	917	scaffold46657	3017700	4854284	+	1836585	865950040
Chr3B	1034	chr3B	918	scaffold112541	4928657	6663781	-	1735125	865950040
Chr3B	1035	chr3B	919	scaffold49744	6811953	7551478	+	739526	865950040
Chr3B	1036	chr3B	920	scaffold57282	7707528	9055594	+	1348067	865950040
Chr3B	1037	chr3B	921	scaffold50206	9062710	11307349	-	2244640	865950040
Chr3B	1038	chr3B	922	scaffold14068	11378799	13035194	+	1656396	865950040
Chr3B	1039	chr3B	923	scaffold89677	13242707	13932093	-	689387	865950040
Chr3B	1040	chr3B	924	scaffold17708	13956277	15647281	+	1691005	865950040
Chr3B	1041	chrUn		scaffold122811	15657994	15766378	-	108385	865950040
Chr3B	1042	chr3B	925	scaffold34634	15817127	16667526	+	850400	865950040
Chr3B	1043	chr3B	926	scaffold55348	16697010	18121538	+	1424529	865950040
Chr3B	1044	chr3B	927	scaffold67270	18186727	19411172	+	1224446	865950040
Chr3B	1045	chr3B	928	scaffold94163	19414010	21367659	+	1953650	865950040
Chr3B	1046	chr3B	929	scaffold49506	21437700	22068227	+	630528	865950040
Chr3B	1047	chrUn		scaffold40	22145231	22545276	+	400046	865950040
Chr3B	1048	chrUn		scaffold7638	22553903	22631886	-	77984	865950040
Chr3B	1049	chrUn		scaffold83956	22731781	22887331	-	155551	865950040
Chr3B	1050	chr3B	930	scaffold116100	22941937	23433128	-	491192	865950040
Chr3B	1051	chr3B	931	scaffold35429	23672115	31550484	-	7878370	865950040
Chr3B	1052	chrUn		scaffold26908	32073392	32285039	-	211648	865950040
Chr3B	1053	chrUn		scaffold30007	32433797	32737227	-	303431	865950040
Chr3B	1054	chr3B	932	scaffold280	32776809	35055831	+	2279023	865950040
Chr3B	1055	chr3B	933	scaffold39942	35078336	39750784	+	4672449	865950040
Chr3B	1056	chr3B	934	scaffold71972	39754196	42407503	+	2653308	865950040
Chr3B	1057	chrUn		scaffold112189	42561484	42852993	-	291510	865950040
Chr3B	1058	chr3B	935	scaffold59558	43414429	43737689	+	323261	865950040
Chr3B	1059	chr3B	936	scaffold102133	43934936	44428495	-	493560	865950040
Chr3B	1060	chrUn		scaffold85835	44447347	44540521	-	93175	865950040
Chr3B	1061	chr3B	937	scaffold87244	44717236	45063050	-	345815	865950040
Chr3B	1062	chr3B	938	scaffold19449	45074845	47345647	-	2270803	865950040
Chr3B	1063	chr3B	939	scaffold19220	47391575	51038807	-	3647233	865950040
Chr3B	1064	chr3B	940	scaffold68639	51054094	52368128	+	1314035	865950040
Chr3B	1065	chr3B	941	scaffold34140	52497263	53567200	-	1069938	865950040
Chr3B	1066	chr3B	942	scaffold8405	53598246	55029045	-	1430800	865950040
Chr3B	1067	chr3B	943	scaffold99911	55034545	55640774	+	615554	865950040
Chr3B	1068	chr3B	944	scaffold103901	55706367	57650584	-	1944218	865950040
Chr3B	1069	chr3B	945	scaffold123244	57654016	58946726	-	1292711	865950040
Chr3B	1070	chr1B	311	scaffold83636	59171233	59818740	-	647508	865950040
Chr3B	1071	chr3B	946	scaffold62180	59875875	62740597	-	2864723	865950040
Chr3B	1072	chr3B	947	scaffold62303	62741097	64129122	+	1388026	865950040
Chr3B	1073	chrUn		scaffold36245	64132569	64290972	-	158404	865950040
Chr3B	1074	chr3B	948	scaffold28435	64291973	64941237	+	649265	865950040
Chr3B	1075	chr3B	949	scaffold100267	64991170	65841655	-	850486	865950040
Chr3B	1076	chr3B	950	scaffold21456	65983698	67141656	-	1157959	865950040
Chr3B	1077	chr3B	951	scaffold79340_r2	67176034	69061523	-	1885490	865950040
Chr3B	1078	chr3B	952	scaffold85711-1_r1	69062523	70063270	+	1000748	865950040
Chr3B	1079	chr3B	953	scaffold102593	70064270	73809644	+	3745375	865950040
Chr3B	1080	chr3B	954	scaffold110875-1	73817416	74513722	-	696307	865950040
Chr3B	1081	chr3B	955	scaffold30504	74557710	77235729	-	2678020	865950040
Chr3B	1082	chr3B	956	scaffold33125	77236730	82454255	-	5217526	865950040
Chr3B	1083	chr3B	957	scaffold45328	82460016	83881766	+	1421751	865950040
Chr3B	1084	chr3B	958	scaffold36854	83951996	87279856	-	3327861	865950040
Chr3B	1085	chr3B	959	scaffold23584	87282013	89994806	+	2712794	865950040
Chr3B	1086	chr3B	960	scaffold44256	90005444	90544813	-	539370	865950040
Chr3B	1087	chr3B	961	scaffold63924	90546761	93201130	+	2654370	865950040
Chr3B	1088	chrUn		scaffold101834	93211090	93370266	+	159177	865950040
Chr3B	1089	chr3B	962	scaffold96918	93370367	96565190	+	3194824	865950040
Chr3B	1090	chr3B	963	scaffold120273	96588297	103691552	+	7103256	865950040
Chr3B	1091	chr3B	964	scaffold104907-2	103691653	107794886	+	4103234	865950040
Chr3B	1092	chr3B	965	scaffold93133	108053709	115938067	-	7884359	865950040
Chr3B	1093	chr3B	967	scaffold61762	115956293	117308572	-	1352280	865950040
Chr3B	1094	chr3B	966	scaffold38186	117392457	119929724	-	2537268	865950040
Chr3B	1095	chr3B	969	scaffold140106	119935764	124204299	+	4268536	865950040
Chr3B	1096	chr3B	972	scaffold48247	124205300	135067726	+	10862427	865950040
Chr3B	1097	chr3B	973	scaffold12821	135139844	139046021	-	3906178	865950040
Chr3B	1098	chr3B	974	scaffold82657-2	139154739	141898381	+	2743643	865950040
Chr3B	1099	chr3B	975	scaffold59083	142213156	143738675	-	1525520	865950040
Chr3B	1100	chr3B	976	scaffold42459	143749234	145897442	-	2148209	865950040
Chr3B	1101	chr3B	977	scaffold18529-3	145906132	146372698	-	466567	865950040
Chr3B	1102	chr3B	978	scaffold45639	146375820	157548402	+	11172583	865950040
Chr3B	1103	chr3B	979	scaffold18920	157555855	162229106	+	4673252	865950040
Chr3B	1104	chr3B	980	scaffold67764	162284053	163891360	-	1607308	865950040
Chr3B	1105	chr3B	981	scaffold32162	163892361	164201488	-	309128	865950040
Chr3B	1106	chr3B	982	scaffold11506	164232013	164799953	-	567941	865950040
Chr3B	1107	chr3B	983	scaffold93732	164806301	165626726	-	820426	865950040
Chr3B	1108	chrUn		scaffold53576	165627727	165819076	-	191350	865950040
Chr3B	1109	chr3B	984	scaffold62676	165822128	182715325	+	16893198	865950040
Chr3B	1110	chr3B	985	scaffold7577	182742188	184872577	-	2130390	865950040
Chr3B	1111	chr3B	986	scaffold25994	184924021	194410145	-	9486125	865950040
Chr3B	1112	chr3B	987	scaffold47072	194410645	195604281	+	1193637	865950040
Chr3B	1113	chr3B	1004	scaffold115660_r2	195609536	206304593	-	10695058	865950040
Chr3B	1114	chr3B	988	scaffold33093-1	206311352	207088187	+	776836	865950040
Chr3B	1115	chr3B	989	scaffold49474	207092246	209863441	+	2771196	865950040
Chr3B	1116	chr3B	990	scaffold15140	209866955	215336261	+	5469307	865950040
Chr3B	1117	chr3B	991	scaffold78831	215350406	226058418	+	10708013	865950040
Chr3B	1118	chr3B	992	scaffold25881	226068448	232015197	-	5946750	865950040
Chr3B	1119	chr3B	993	scaffold93820	232016198	232624080	-	607883	865950040
Chr3B	1120	chrUn		scaffold66448	232626320	232890092	+	263773	865950040
Chr3B	1121	chr3B	994	scaffold52207	232898137	236954027	+	4055891	865950040
Chr3B	1122	chr3B	995	scaffold126092	236960411	240070603	-	3110193	865950040
Chr3B	1123	chr3B	996	scaffold50805	240078133	240791719	-	713587	865950040
Chr3B	1124	chr3B	997	scaffold74110	240792720	241607383	-	814664	865950040
Chr3B	1125	chr3B	998	scaffold53974	241788334	245871233	+	4082900	865950040
Chr3B	1126	chr3B	999	scaffold31402	245878450	252251692	-	6373243	865950040
Chr3B	1127	chr3B	1000	scaffold74870	252252192	256365858	-	4113667	865950040
Chr3B	1128	chr3B	1001	scaffold118912	256382539	260883137	+	4500599	865950040
Chr3B	1129	chr3B	1002	scaffold25051	260892622	270594968	-	9702347	865950040
Chr3B	1130	chr3B	1003	scaffold74283	270604671	272453792	-	1849122	865950040
Chr3B	1131	chr3B	1004	scaffold115660_r1	272459276	285519714	-	13060439	865950040
Chr3B	1132	chr3B	1005	scaffold17453-4	285520080	286064905	+	544826	865950040
Chr3B	1133	chr3B	1006	scaffold30292	286067077	289722614	+	3655538	865950040
Chr3B	1134	chr3B	1007	scaffold108795-1	289733764	292722992	+	2989229	865950040
Chr3B	1135	chr3B	1008	scaffold70969-1	292793094	293938594	-	1145501	865950040
Chr3B	1136	chr3B	1009	scaffold27143	293943150	296887610	-	2944461	865950040
Chr3B	1137	chr3B	1010	scaffold26713	296888611	297925153	-	1036543	865950040
Chr3B	1138	chr3B	1011	scaffold54528	297926154	304355562	-	6429409	865950040
Chr3B	1139	chr3B	1012	scaffold98445	304378479	312101373	+	7722895	865950040
Chr3B	1140	chr3B	1013	scaffold87812-2	312102374	317853582	+	5751209	865950040
Chr3B	1141	chr3B	1014	scaffold13883	317860917	319086499	-	1225583	865950040
Chr3B	1142	chr3B	1015	scaffold119894-2	319204351	335722929	+	16518579	865950040
Chr3B	1143	chr3B	1016	scaffold60502	335735946	339985546	+	4249601	865950040
Chr3B	1144	chr3B	1017	scaffold94389-1	339986547	342209853	+	2223307	865950040
Chr3B	1145	chr3B	1018	scaffold24763-1	342360750	343772735	-	1411986	865950040
Chr3B	1146	chr3B	1019	scaffold57270	343804441	355056350	-	11251910	865950040
Chr3B	1147	chr3B	1020	scaffold37070	355066104	356832552	-	1766449	865950040
Chr3B	1148	chr3B	1021	scaffold20168	356833553	357225491	+	391939	865950040
Chr3B	1149	chr3B	1022	scaffold94482	357226492	357624037	+	397546	865950040
Chr3B	1150	chr3B	1023	scaffold55579	357625038	358267075	+	642038	865950040
Chr3B	1151	chr3B	1024	scaffold42128	358268076	358625967	+	357892	865950040
Chr3B	1152	chr3B	1025	scaffold64950	358626968	359153249	+	526282	865950040
Chr3B	1153	chr3B	1026	scaffold58845	359154250	361791314	-	2637065	865950040
Chr3B	1154	chr3B	1027	scaffold110693-1	361792315	366052157	-	4259843	865950040
Chr3B	1155	chr3B	1028	scaffold83302_r3	366053158	367765730	-	1712573	865950040
Chr3B	1156	chr3B	1028	scaffold83302_r1	367765830	368562068	-	796239	865950040
Chr3B	1157	chr3B	1029	scaffold55756	368563068	369044192	+	481125	865950040
Chr3B	1158	chr3B	1031	scaffold57159	369045193	370672738	-	1627546	865950040
Chr3B	1159	chr3B	1030	scaffold95487-1	370689948	371016817	+	326870	865950040
Chr3B	1160	chr3B	1032	scaffold122713-1	371017818	380573669	-	9555852	865950040
Chr3B	1161	chr3B	1033	scaffold141905	380574670	384707040	+	4132371	865950040
Chr3B	1162	chr3B	1034	scaffold7566	384735949	387782926	-	3046978	865950040
Chr3B	1163	chr3B	1035	scaffold63551	387795913	388542435	-	746523	865950040
Chr3B	1164	chr3B	1036	scaffold51256	388543811	390655375	+	2111565	865950040
Chr3B	1165	chr3B	1037	scaffold54145	391274038	393318026	-	2043989	865950040
Chr3B	1166	chr3B	1038	scaffold102287	393319525	394542355	-	1222831	865950040
Chr3B	1167	chr3B	1039	scaffold10025	394550681	396142664	+	1591984	865950040
Chr3B	1168	chr3B	1040	scaffold113107	396152601	402849447	+	6696847	865950040
Chr3B	1169	chr3B	1041	scaffold118618	402850448	418746528	+	15896081	865950040
Chr3B	1170	chr3B	1042	scaffold63270	418750713	419793084	+	1042372	865950040
Chr3B	1171	chr3B	1043	scaffold156269	419794085	422087303	+	2293219	865950040
Chr3B	1172	chr3B	1044	scaffold49616	422088304	434323542	-	12235239	865950040
Chr3B	1173	chr3B	1045	scaffold101718	434337642	441042576	+	6704935	865950040
Chr3B	1174	chr3B	1046	scaffold45994	441055374	441432613	+	377240	865950040
Chr3B	1175	chr3B	1047	scaffold87526	441440493	442089702	+	649210	865950040
Chr3B	1176	chr3B	1048	scaffold13577	442168823	447174666	+	5005844	865950040
Chr3B	1177	chr3B	1049	scaffold81518	447175166	449566750	-	2391585	865950040
Chr3B	1178	chr3B	1050	scaffold133073	449567250	453126786	+	3559537	865950040
Chr3B	1179	chr3B	1051	scaffold53118	453132884	464284405	+	11151522	865950040
Chr3B	1180	chr3B	1052	scaffold34474	464287850	477165686	+	12877837	865950040
Chr3B	1181	chr3B	1053	scaffold66433	477240092	480889720	-	3649629	865950040
Chr3B	1182	chr3B	1054	scaffold33863-3	480921564	481510093	-	588530	865950040
Chr3B	1183	chr3B	1055	scaffold70264	481534268	483797012	-	2262745	865950040
Chr3B	1184	chr3B	1056	scaffold95274-1	484008092	491574092	+	7566001	865950040
Chr3B	1185	chr3B	1057	scaffold23823	491596244	501056623	-	9460380	865950040
Chr3B	1186	chr3B	1058	scaffold53353	501059560	503141204	-	2081645	865950040
Chr3B	1187	chr3B	1059	scaffold17019	503147911	505304267	+	2156357	865950040
Chr3B	1188	chr3B	1060	scaffold141620	505339361	506197130	-	857770	865950040
Chr3B	1189	chr3B	1061	scaffold114944	506235233	507568302	+	1333070	865950040
Chr3B	1190	chr3B	1062	scaffold47944	507588985	511098984	-	3510000	865950040
Chr3B	1191	chr3B	1063	scaffold31897	511118213	524901709	-	13783497	865950040
Chr3B	1192	chr3B	1064	scaffold94257	524902709	533713853	+	8811145	865950040
Chr3B	1193	chr3B	1065	scaffold52213	533828572	537434955	+	3606384	865950040
Chr3B	1194	chrUn		scaffold105422	537440314	537638756	+	198443	865950040
Chr3B	1195	chr3B	1066	scaffold38141	537650349	538481757	-	831409	865950040
Chr3B	1196	chr3B	1067	scaffold34301-1	538483797	541923268	-	3439472	865950040
Chr3B	1197	chr3B	1068	scaffold25415	541949628	545290694	-	3341067	865950040
Chr3B	1198	chr3B	1069	scaffold37007	545297593	547588631	+	2291039	865950040
Chr3B	1199	chr3B	1070	scaffold16666	547723613	548926331	+	1202719	865950040
Chr3B	1200	chr3B	1071	scaffold132242-1	548976775	550563955	-	1587181	865950040
Chr3B	1201	chr3B	1072	scaffold51372-1	550567501	560930980	-	10363480	865950040
Chr3B	1202	chr3B	1073	scaffold125697-1	560936404	566898129	+	5961726	865950040
Chr3B	1203	chrUn		scaffold96440	566906647	566977197	-	70551	865950040
Chr3B	1204	chr3B	1074	scaffold100842_r1	567031733	582110982	-	15079250	865950040
Chr3B	1205	chr3B	1075	scaffold80584	582170912	590549428	+	8378517	865950040
Chr3B	1206	chr3B	1076	scaffold65241	590569741	591811937	+	1242197	865950040
Chr3B	1207	chr3B	1077	scaffold62524	591881419	596568550	-	4687132	865950040
Chr3B	1208	chr3B	1078	scaffold1988	596574815	600681793	-	4106979	865950040
Chr3B	1209	chr3B	1079	scaffold6735	600692756	601768147	+	1075392	865950040
Chr3B	1210	chr3B	1080	scaffold80603-2	601768647	602624568	-	855922	865950040
Chr3B	1211	chr3B	1081	scaffold106891-2	602625569	618751920	-	16126352	865950040
Chr3B	1212	chr3B	1082	scaffold6803	618756162	620686388	+	1930227	865950040
Chr3B	1213	chr3B	1083	scaffold54190	620687388	627910897	+	7223510	865950040
Chr3B	1214	chr3B	1084	scaffold12708	627911397	629694272	+	1782876	865950040
Chr3B	1215	chr3B	1085	scaffold10748	629694772	640107222	-	10412451	865950040
Chr3B	1216	chr3B	1086	scaffold20980	640116850	641863985	+	1747136	865950040
Chr3B	1217	chr3B	1087	scaffold46139-1	641864485	643605388	-	1740904	865950040
Chr3B	1218	chr3B	1088	scaffold9144	643613977	646353381	+	2739405	865950040
Chr3B	1219	chr3B	1089	scaffold63983	646396315	653911924	-	7515610	865950040
Chr3B	1220	chr3B	1090	scaffold44509	653965955	654337835	+	371881	865950040
Chr3B	1221	chr3B	1091	scaffold112131	654338371	660990127	+	6651757	865950040
Chr3B	1222	chr3B	1092	scaffold68238	661005226	667960391	+	6955166	865950040
Chr3B	1223	chr3B	1093	scaffold62593	667985106	669882452	+	1897347	865950040
Chr3B	1224	chr3B	1094	scaffold17194	669919031	672912929	-	2993899	865950040
Chr3B	1225	chr3B	1095	scaffold50661	672984867	674305601	+	1320735	865950040
Chr3B	1226	chr3B	1096	scaffold68810	674361624	678658730	-	4297107	865950040
Chr3B	1227	chr3B	1097	scaffold20302	678747792	701932026	+	23184235	865950040
Chr3B	1228	chr3B	1098	scaffold83381	701932265	702825039	+	892775	865950040
Chr3B	1229	chr3B	1099	scaffold11638	702825539	705188778	-	2363240	865950040
Chr3B	1230	chrUn		scaffold65039	705920724	706016990	+	96267	865950040
Chr3B	1231	chr3B	1100	scaffold58919	706089642	707880428	-	1790787	865950040
Chr3B	1232	chr3B	1101	scaffold22974	707881045	712610953	-	4729909	865950040
Chr3B	1233	chr3B	1102	scaffold5599-2	712632237	724415602	-	11783366	865950040
Chr3B	1234	chr3B	1103	scaffold66351	724419829	731742277	+	7322449	865950040
Chr3B	1235	chr3B	1104	scaffold14534-2	731744924	733059614	-	1314691	865950040
Chr3B	1236	chrUn		scaffold36068	733059795	733225355	+	165561	865950040
Chr3B	1237	chrUn		scaffold61964	733229758	733402026	-	172269	865950040
Chr3B	1238	chr7B	2599	scaffold21311-7_r2	733402071	733824076	-	422007	865950040
Chr3B	1239	chrUn		scaffold18169	734131984	734276154	-	144171	865950040
Chr3B	1240	chr3B	1105	scaffold29845	734324339	736580018	-	2255680	865950040
Chr3B	1241	chr3B	1106	scaffold101643	736581019	739076993	-	2495975	865950040
Chr3B	1242	chr3B	1107	scaffold115048	739383164	739841826	+	458663	865950040
Chr3B	1243	chr3B	1108	scaffold98830-1	739853922	744840137	+	4986216	865950040
Chr3B	1244	chrUn		scaffold109469-1	744840238	745087802	+	247565	865950040
Chr3B	1245	chr3B	1109	scaffold74126	745113671	746697734	+	1584064	865950040
Chr3B	1246	chr3B	1110	scaffold88002-2	746789586	752424496	-	5634911	865950040
Chr3B	1247	chr3B	1111	scaffold106316	752428019	753130308	-	702290	865950040
Chr3B	1248	chr3B	1112	scaffold113967	753130409	762961583	+	9831175	865950040
Chr3B	1249	chr3B	1113	scaffold3290-1	763180643	768120319	+	4939677	865950040
Chr3B	1250	chr3B	1114	scaffold86066	768120420	769902592	+	1782173	865950040
Chr3B	1251	chrUn		scaffold51892	770065288	770314853	-	249566	865950040
Chr3B	1252	chr3B	1115	scaffold13262	770342638	772407886	-	2065249	865950040
Chr3B	1253	chrUn		scaffold97647	772409663	772667022	+	257360	865950040
Chr3B	1254	chr3B	1116	scaffold18651	772715446	773164181	-	448736	865950040
Chr3B	1255	chr3B	1117	scaffold68301	773304352	774131996	+	827645	865950040
Chr3B	1256	chrUn		scaffold11138	774132997	774453963	-	320967	865950040
Chr3B	1257	chr3B	1118	scaffold37690	774460999	776842824	-	2381826	865950040
Chr3B	1258	chr3B	1119	scaffold48480	776983033	777974569	-	991537	865950040
Chr3B	1259	chrUn		scaffold111809	778062856	778404866	-	342011	865950040
Chr3B	1260	chr3B	1120	scaffold5855-3	778481505	779049447	-	567943	865950040
Chr3B	1261	chrUn		scaffold75211	779050448	779326767	+	276320	865950040
Chr3B	1262	chr3B	1121	scaffold9977	779384169	779935987	+	551819	865950040
Chr3B	1263	chr3B	1122	scaffold46225	779936988	781430220	-	1493233	865950040
Chr3B	1264	chr3B	1123	scaffold47719	781837850	783311100	+	1473251	865950040
Chr3B	1265	chr3B	1124	scaffold5424	783350284	784875006	+	1524723	865950040
Chr3B	1266	chr3B	1125	scaffold80722	784957181	786435224	+	1478044	865950040
Chr3B	1267	chr3B	1126	scaffold153636	786435724	787851390	+	1415667	865950040
Chr3B	1268	chrUn		scaffold59191	787859868	788072756	+	212889	865950040
Chr3B	1269	chr3B	1127	scaffold383	788153543	788765858	-	612316	865950040
Chr3B	1270	chr3B	1128	scaffold384	788773008	791895530	+	3122523	865950040
Chr3B	1271	chr3B	1129	scaffold45461	792115717	792516915	+	401199	865950040
Chr3B	1272	chrUn		scaffold154786	792716545	792917237	-	200693	865950040
Chr3B	1273	chr3B	1130	scaffold148509	793115833	793559312	-	443480	865950040
Chr3B	1274	chrUn		scaffold116821-2	793559413	793670854	-	111442	865950040
Chr3B	1275	chr3B	1132	scaffold115957	793671855	795030527	-	1358673	865950040
Chr3B	1276	chr3B	1131	scaffold5627	795277953	795722573	+	444621	865950040
Chr3B	1277	chr3B	1133	scaffold13539	795723573	797594337	-	1870765	865950040
Chr3B	1278	chrUn		scaffold83325	797600683	797804666	+	203984	865950040
Chr3B	1279	chrUn		scaffold100256	797873997	798063161	-	189165	865950040
Chr3B	1280	chr3B	1134	scaffold104210	798063661	798432056	-	368396	865950040
Chr3B	1281	chr3B	1135	scaffold18143	798677916	799170995	+	493080	865950040
Chr3B	1282	chr3B	1136	scaffold99564	799202867	799579722	-	376856	865950040
Chr3B	1283	chr3B	1137	scaffold43843	799611536	801304857	+	1693322	865950040
Chr3B	1284	chr3B	1138	scaffold11682-1	801480618	803169511	+	1688894	865950040
Chr3B	1285	chr3B	1139	scaffold74628-1	803424229	806443322	-	3019094	865950040
Chr3B	1286	chr3B	1140	scaffold39017	806464185	808720436	-	2256252	865950040
Chr3B	1287	chr3B	1141	scaffold57695	808860912	809410032	-	549121	865950040
Chr3B	1288	chr3B	1142	scaffold11220	809474785	810110917	-	636133	865950040
Chr3B	1289	chr3B	1143	scaffold97186	810206628	810916186	-	709559	865950040
Chr3B	1290	chrUn		scaffold15428	810927159	811027005	+	99847	865950040
Chr3B	1291	chr3B	1144	scaffold34069	811263464	812120735	+	857272	865950040
Chr3B	1292	chr3B	1145	scaffold49444	812128702	812711502	+	582801	865950040
Chr3B	1293	chr3B	1168	scaffold51649_r2	812715238	813090142	-	374905	865950040
Chr3B	1294	chr3B	1146	scaffold113028	813096986	814018791	+	921806	865950040
Chr3B	1295	chr3B	1147	scaffold12172	814123521	815579168	-	1455648	865950040
Chr3B	1296	chr3B	1148	scaffold2334	815580319	816632223	-	1051905	865950040
Chr3B	1297	chr3B	1149	scaffold33863-1	816707604	817164820	+	457217	865950040
Chr3B	1298	chrUn		scaffold33863-2	817200697	817276420	+	75724	865950040
Chr3B	1299	chrUn		scaffold8108-2	817276437	817535195	+	258759	865950040
Chr3B	1300	chrUn		scaffold49345	817535695	817754454	+	218760	865950040
Chr3B	1301	chr3B	1150	scaffold142642	817767015	818313106	+	546092	865950040
Chr3B	1302	chr3B	1151	scaffold27855	818313606	821072711	+	2759106	865950040
Chr3B	1303	chr3B	1152	scaffold8536	821329156	821693027	-	363872	865950040
Chr3B	1304	chr3B	1153	scaffold18416	821799429	822347754	+	548326	865950040
Chr3B	1305	chr3B	1154	scaffold8275	822390941	823286594	+	895654	865950040
Chr3B	1306	chr3B	1155	scaffold33593-1	823323349	826158293	+	2866303	865950040
Chr3B	1307	chrUn		scaffold1065	826159293	826237421	-	78129	865950040
Chr3B	1308	chr3B	1156	scaffold125249	826484488	828490255	+	2005768	865950040
Chr3B	1309	chrUn		scaffold130226	828504063	828679160	+	175098	865950040
Chr3B	1310	chr3B	1157	scaffold25447	828730211	829077019	-	346809	865950040
Chr3B	1311	chr3B	1158	scaffold1771	829189616	829886542	-	696927	865950040
Chr3B	1312	chr3B	1159	scaffold47961	829948664	830838898	+	890235	865950040
Chr3B	1313	chrUn		scaffold112908	830845305	830945911	+	100607	865950040
Chr3B	1314	chr3B	1160	scaffold10714	831101726	832834929	-	1733204	865950040
Chr3B	1315	chr3B	1161	scaffold16565	832835930	833416003	-	580074	865950040
Chr3B	1316	chr3B	1162	scaffold34846	833434665	835956143	+	2521479	865950040
Chr3B	1317	chr3B	1163	scaffold73662_r1	835972420	836513548	+	541129	865950040
Chr3B	1318	chr3B	1163	scaffold73662_r3	836521796	837861332	+	1339537	865950040
Chr3B	1319	chr3B	1164	scaffold39229	837870259	838575255	+	704997	865950040
Chr3B	1320	chrUn		scaffold43086	838611488	838790085	-	178598	865950040
Chr3B	1321	chr3B	1165	scaffold114006	838866759	840078372	+	1211614	865950040
Chr3B	1322	chr3B	1167	scaffold63133	840079373	841470210	+	1390838	865950040
Chr3B	1323	chr3B	1166	scaffold97134	841482631	842933058	+	1450428	865950040
Chr3B	1324	chr3B	1168	scaffold51649_r1	842934059	843672056	+	737998	865950040
Chr3B	1325	chr3B	1169	scaffold5599-1	843673056	844684108	-	1011053	865950040
Chr3B	1326	chr3B	1170	scaffold19322	844790281	846179584	-	1389304	865950040
Chr3B	1327	chr3B	1171	scaffold5975	846180084	846891872	+	711789	865950040
Chr3B	1328	chr3B	1172	scaffold14611	847131429	849825639	+	2694211	865950040
Chr3B	1329	chr3B	1173	scaffold101249	849864725	850362211	-	497487	865950040
Chr3B	1330	chr3B	1174	scaffold12374	850363212	852151256	-	1788045	865950040
Chr3B	1331	chr3B	1175	scaffold34054	852891745	853515049	+	623305	865950040
Chr3B	1332	chr3B	1176	scaffold90062	853613080	854752819	-	1139740	865950040
Chr3B	1333	chr3B	1177	scaffold35913	854771987	855592642	+	820656	865950040
Chr3B	1334	chrUn		scaffold114324	855669301	855839007	+	169707	865950040
Chr3B	1335	chrUn		scaffold100609	855916933	856138628	-	221696	865950040
Chr3B	1336	chr3B	1178	scaffold21441	856335514	858075335	-	1739822	865950040
Chr3B	1337	chrUn		scaffold95220	858077814	858286603	+	208790	865950040
Chr3B	1338	chr3B	1179	scaffold17288	858299617	859212899	-	913283	865950040
Chr3B	1339	chr3B	1180	scaffold72944	859261760	859629181	-	367422	865950040
Chr3B	1340	chr3B	1181	scaffold71048	859651298	860731304	+	1080007	865950040
Chr3B	1341	chr3B	1182	scaffold51200	860735612	861981258	+	1245647	865950040
Chr3B	1342	chrUn		scaffold107398	862046362	862329245	+	282884	865950040
Chr3B	1343	chrUn		scaffold2341	862706102	863086145	-	380044	865950040
Chr3B	1344	chr3B	1184	scaffold84367	863087146	864658401	-	1571256	865950040
Chr3B	1345	chr3B	1183	scaffold8119	865060121	865950040	-	889920	865950040
Chr4A	1346	chr4A	1186	scaffold92136	1	769981	+	769982	751837965
Chr4A	1347	chr4A	1185	scaffold149220	773651	2609604	+	1835954	751837965
Chr4A	1348	chr4A	1187	scaffold6523	2664130	5800224	-	3136095	751837965
Chr4A	1349	chr4A	1188	scaffold6621	5839738	6760254	+	920517	751837965
Chr4A	1350	chr4A	1189	scaffold54270	6769734	22969259	-	16199526	751837965
Chr4A	1351	chr4A	1190	scaffold113905	22978205	29854999	-	6876795	751837965
Chr4A	1352	chr4A	1191	scaffold97950	29870435	36528507	-	6658073	751837965
Chr4A	1353	chr4A	1192	scaffold148341	36535516	40609426	-	4073911	751837965
Chr4A	1354	chr4A	1193	scaffold36419	40632631	41217159	+	584529	751837965
Chr4A	1355	chr4A	1194	scaffold42080	41226438	42462286	-	1235849	751837965
Chr4A	1356	chr4A	1195	scaffold83406	42469752	44081982	+	1612231	751837965
Chr4A	1357	chr4A	1196	scaffold60864	44187697	48940840	-	4753144	751837965
Chr4A	1358	chr4A	1197	scaffold87834	48952771	52046684	-	3093914	751837965
Chr4A	1359	chr4A	1198	scaffold113693	52062379	58433604	-	6371226	751837965
Chr4A	1360	chr4A	1199	scaffold102042	58434104	61253507	-	2819404	751837965
Chr4A	1361	chrUn		scaffold95826	61262598	61412977	+	150380	751837965
Chr4A	1362	chr4A	1200	scaffold59322	61726329	66331672	-	4605344	751837965
Chr4A	1363	chr4A	1201	scaffold43130	66428595	67411733	+	983139	751837965
Chr4A	1364	chr4A	1202	scaffold30561	67424102	71440222	+	4016121	751837965
Chr4A	1365	chr4A	1203	scaffold3045	71440988	74361924	+	2920937	751837965
Chr4A	1366	chr4A	1204	scaffold3046	74422061	75567093	-	1145033	751837965
Chr4A	1367	chr4A	1205	scaffold23760	75574821	83581358	-	8006538	751837965
Chr4A	1368	chr4A	1206	scaffold56013	83660215	93260251	+	9600037	751837965
Chr4A	1369	chr4A	1207	scaffold8846	93274767	93803885	+	529119	751837965
Chr4A	1370	chr4A	1208	scaffold20164	93813517	97518093	+	3704577	751837965
Chr4A	1371	chr4A	1209	scaffold6672	97621526	106749311	-	9127786	751837965
Chr4A	1372	chr4A	1210	scaffold37253	106756630	107111513	-	354884	751837965
Chr4A	1373	chr4A	1211	scaffold150916	107199933	110416201	+	3216269	751837965
Chr4A	1374	chr4A	1212	scaffold30495	110420229	114660874	-	4240646	751837965
Chr4A	1375	chr4A	1213	scaffold6696	114698017	118874011	-	4175995	751837965
Chr4A	1376	chr4A	1214	scaffold108707	118932538	150273139	+	31340602	751837965
Chr4A	1377	chr4A	1216	scaffold122074	150283609	156512493	+	6228885	751837965
Chr4A	1378	chr4A	1217	scaffold58366	156634035	164488986	+	7854952	751837965
Chr4A	1379	chr4A	1218	scaffold92618-9	164496691	172538116	+	8041426	751837965
Chr4A	1380	chrUn		scaffold127065	172776421	173011527	+	235107	751837965
Chr4A	1381	chr4A	1219	scaffold96540	173021840	180349060	+	7327221	751837965
Chr4A	1382	chr4A	1220	scaffold21369	180357713	191890574	+	11532862	751837965
Chr4A	1383	chr4A	1221	scaffold43508	191899461	194765553	-	2866093	751837965
Chr4A	1384	chr4A	1222	scaffold139070	194771009	207713485	-	12942477	751837965
Chr4A	1385	chr4A	1223	scaffold93569	207724721	214020251	-	6295531	751837965
Chr4A	1386	chr4A	1224	scaffold46098-1	214154780	219083026	-	4928247	751837965
Chr4A	1387	chr4A	1225	scaffold29661	219091290	219517466	-	426177	751837965
Chr4A	1388	chr4A	1226	scaffold42852_r1	219522316	246739665	+	27217350	751837965
Chr4A	1389	chr4A	1227	scaffold50660	246999169	255183544	-	8184376	751837965
Chr4A	1390	chr4A	1228	scaffold78091	255200199	257853575	-	2653377	751837965
Chr4A	1391	chr4A	1229	scaffold87928	257854075	262580096	+	4726022	751837965
Chr4A	1392	chr4A	1230	scaffold5174	262596771	275044950	+	12448180	751837965
Chr4A	1393	chr4A	1231	scaffold65936	275051802	276737370	+	1685569	751837965
Chr4A	1394	chr4A	1232	scaffold71647	276749137	278286944	+	1537808	751837965
Chr4A	1395	chrUn		scaffold51662-1	278287113	278440484	-	153372	751837965
Chr4A	1396	chr4A	1239	scaffold18813	279716472	281925220	+	2208749	751837965
Chr4A	1397	chr4A	1238	scaffold38793	281925321	283567942	+	1642622	751837965
Chr4A	1398	chr4A	1236	scaffold1790-1	283572340	293455174	+	9882835	751837965
Chr4A	1399	chr4A	1235	scaffold52937	293493962	294472184	+	978223	751837965
Chr4A	1400	chr4A	1234	scaffold73287	294661283	306422623	-	11761341	751837965
Chr4A	1401	chr4A	1233	scaffold29347-2_r3	306510456	310071912	-	3561457	751837965
Chr4A	1402	chr4A	1233	scaffold29347-2_r1	310142377	310486709	-	344333	751837965
Chr4A	1403	chr4A	1226	scaffold42852_r2	310503329	313539236	+	3035908	751837965
Chr4A	1404	chr4A	1240	scaffold113683	313540237	314591550	-	1051314	751837965
Chr4A	1405	chr4A	1241	scaffold28972	314592551	315332491	+	739941	751837965
Chr4A	1406	chr4A	1242	scaffold20060	315333492	315832321	+	498830	751837965
Chr4A	1407	chr4A	1243	scaffold51444	315833322	316261657	+	428336	751837965
Chr4A	1408	chr4A	1245	scaffold36851	316262658	316906478	-	643821	751837965
Chr4A	1409	chr4A	1244	scaffold121607	316961241	317853767	-	892527	751837965
Chr4A	1410	chr4A	1246	scaffold6940	317854768	318232892	+	378125	751837965
Chr4A	1411	chr4A	1247	scaffold140761	318233893	318691938	+	458046	751837965
Chr4A	1412	chr4A	1248	scaffold66191	318692939	344818935	-	26125997	751837965
Chr4A	1413	chr4A	1249	scaffold53825	344910934	349324294	+	4413361	751837965
Chr4A	1414	chr4A	1250	scaffold124252	349328858	350833858	-	1505001	751837965
Chr4A	1415	chr4A	1253	scaffold89549	350834859	360884030	+	10049172	751837965
Chr4A	1416	chr4A	1254	scaffold17213	360884955	369614194	-	8729240	751837965
Chr4A	1417	chr7B	2719	scaffold51662-3_r2	369615195	370067531	+	452337	751837965
Chr4A	1418	chr4A	1255	scaffold57206	370071661	372134008	-	2062348	751837965
Chr4A	1419	chr4A	1256	scaffold14900	372193269	372831948	-	638680	751837965
Chr4A	1420	chr4A	1257	scaffold13474	372832949	392136371	-	19303423	751837965
Chr4A	1421	chr4A	1258	scaffold25443	392140425	396341313	+	4200889	751837965
Chr4A	1422	chr4A	1259	scaffold24415	396349431	399024688	-	2675258	751837965
Chr4A	1423	chr4A	1260	scaffold99837	399045084	406357675	-	7312592	751837965
Chr4A	1424	chr4A	1261	scaffold33342	406362055	416143688	-	9781634	751837965
Chr4A	1425	chr4A	1262	scaffold63515	416455405	416978190	+	522786	751837965
Chr4A	1426	chr4A	1263	scaffold97408	416991193	425454526	+	8463334	751837965
Chr4A	1427	chr4A	1264	scaffold90549	425626081	434332715	-	8706635	751837965
Chr4A	1428	chr4A	1265	scaffold57300	434344773	441392338	+	7047566	751837965
Chr4A	1429	chr4A	1266	scaffold93224	441400458	442051380	+	650923	751837965
Chr4A	1430	chr4A	1267	scaffold9742	442163633	451363084	-	9199452	751837965
Chr4A	1431	chr4A	1268	scaffold102592	451384306	456936032	+	5551727	751837965
Chr4A	1432	chrUn		scaffold88249	457003507	457189261	+	185755	751837965
Chr4A	1433	chr4A	1269	scaffold7163	457238501	460057624	-	2819124	751837965
Chr4A	1434	chr4A	1270	scaffold28208	460270302	480068935	-	19798634	751837965
Chr4A	1435	chr4A	1271	scaffold111908	480416380	502843266	-	22426887	751837965
Chr4A	1436	chr4A	1272	scaffold92758	502886617	506799011	-	3912395	751837965
Chr4A	1437	chr4A	1273	scaffold64044	506823787	522788748	-	15964962	751837965
Chr4A	1438	chr4A	1274	scaffold51372-2	522795108	535025903	+	12230796	751837965
Chr4A	1439	chr4A	1275	scaffold84923-2	535033347	535541148	-	507802	751837965
Chr4A	1440	chr4A	1276	scaffold50431	535546236	550438289	+	14892054	751837965
Chr4A	1441	chr4A	1277	scaffold49567	550447705	554205353	-	3757649	751837965
Chr4A	1442	chr4A	1278	scaffold69053	554488193	556672504	-	2184312	751837965
Chr4A	1443	chr4A	1279	scaffold113366	556683196	591074827	+	34391632	751837965
Chr4A	1444	chr4A	1280	scaffold88043	591143013	592312961	+	1169949	751837965
Chr4A	1445	chr4A	1281	scaffold131556	592319449	594438895	+	2119447	751837965
Chr4A	1446	chr4A	1282	scaffold14099	594540567	595119830	+	579264	751837965
Chr4A	1447	chr4A	1283	scaffold90020	595159984	596050652	+	890669	751837965
Chr4A	1448	chr4A	1284	scaffold67346-2	596054722	596470642	+	415921	751837965
Chr4A	1449	chr4A	1285	scaffold9058	596807387	598757093	-	1949707	751837965
Chr4A	1450	chr4A	1286	scaffold34309	598857265	599870849	+	1013585	751837965
Chr4A	1451	chrUn		scaffold81336	599915638	600111449	+	195812	751837965
Chr4A	1452	chrUn		scaffold10759	600191623	600395159	-	203537	751837965
Chr4A	1453	chr4A	1287	scaffold16678	600439705	600965223	-	525519	751837965
Chr4A	1454	chr4A	1288	scaffold71022	601035391	601699042	-	663652	751837965
Chr4A	1455	chr4A	1289	scaffold971	601898275	602392100	-	493826	751837965
Chr4A	1456	chrUn		scaffold92430-3	602551820	602809652	-	257833	751837965
Chr4A	1457	chr4A	1290	scaffold29519	602835579	603587583	-	752005	751837965
Chr4A	1458	chr4A	1291	scaffold56531	603588584	604132474	+	543891	751837965
Chr4A	1459	chr4A	1292	scaffold81105	604417563	604964576	-	547014	751837965
Chr4A	1460	chr4A	1293	scaffold18526-1	604991365	605852532	-	861168	751837965
Chr4A	1461	chr4A	1294	scaffold23169	606052283	608799455	-	2747173	751837965
Chr4A	1462	chr4A	1295	scaffold38768-1	608930987	610853987	+	1923001	751837965
Chr4A	1463	chr4A	1296	scaffold38768-4	610855715	611835354	+	979640	751837965
Chr4A	1464	chr4A	1297	scaffold35448	611862979	612471202	-	608224	751837965
Chr4A	1465	chr4A	1298	scaffold52223	612534040	613131563	+	597524	751837965
Chr4A	1466	chr4A	1299	scaffold15183	613158625	614096482	+	937858	751837965
Chr4A	1467	chr4A	1300	scaffold9551	614221136	615774384	+	1553249	751837965
Chr4A	1468	chr4A	1301	scaffold107537	615781904	617276714	-	1494811	751837965
Chr4A	1469	chr4A	1302	scaffold28310	617443917	619818801	-	2374885	751837965
Chr4A	1470	chr4A	1303	scaffold17007	620065893	620501871	-	435979	751837965
Chr4A	1471	chr4A	1304	scaffold11479	620506718	620963917	+	457200	751837965
Chr4A	1472	chr4A	1305	scaffold59419	621011208	621798853	-	787646	751837965
Chr4A	1473	chr4A	1306	scaffold29017	622043993	622995579	+	951587	751837965
Chr4A	1474	chr4A	1307	scaffold102408	623114632	624542889	-	1428258	751837965
Chr4A	1475	chr4A	1308	scaffold120624	624543389	625036305	+	500788	751837965
Chr4A	1476	chrUn		scaffold84087	625036475	625084787	-	48313	751837965
Chr4A	1477	chr4A	1309	scaffold62033	625163325	626433179	-	1269855	751837965
Chr4A	1478	chr4A	1310	scaffold42151	626546761	627930092	+	1383332	751837965
Chr4A	1479	chr4A	1311	scaffold74955	627983429	629260674	+	1277246	751837965
Chr4A	1480	chrUn		scaffold26053	629271683	629480321	+	208639	751837965
Chr4A	1481	chrUn		scaffold14733	629481322	629815288	-	333967	751837965
Chr4A	1482	chr4A	1312	scaffold14400	629825381	632008756	-	2183376	751837965
Chr4A	1483	chr4A	1313	scaffold57382	632018545	634576904	-	2558360	751837965
Chr4A	1484	chr4A	1314	scaffold37396	634587526	637098818	+	2511293	751837965
Chr4A	1485	chr4A	1315	scaffold15805	637105616	644280355	-	7174740	751837965
Chr4A	1486	chr4A	1316	scaffold49914	644291167	647278925	-	2987759	751837965
Chr4A	1487	chr4A	1317	scaffold113291	647291255	653536475	-	6245221	751837965
Chr4A	1488	chr4A	1318	scaffold33863-4	653607723	654476937	-	869215	751837965
Chr4A	1489	chrUn		scaffold143471	654662889	654862469	-	199581	751837965
Chr4A	1490	chr4A	1319	scaffold49516	654909258	656282165	+	1372908	751837965
Chr4A	1491	chr4A	1320	scaffold25703-2	656283166	657342597	+	1059432	751837965
Chr4A	1492	chr4A	1321	scaffold34091	657714132	658479150	+	765019	751837965
Chr4A	1493	chr4A	1322	scaffold59489	658479251	660081984	-	1602734	751837965
Chr4A	1494	chr4A	1323	scaffold4399	660120276	664184552	+	4064277	751837965
Chr4A	1495	chrUn		scaffold85670	664239603	664410311	+	170709	751837965
Chr4A	1496	chrUn		scaffold55803	664410978	664653552	+	242575	751837965
Chr4A	1497	chr4A	1324	scaffold15363	664915688	665368715	+	453028	751837965
Chr4A	1498	chr4A	1325	scaffold32758-1	665445291	665868477	+	423187	751837965
Chr4A	1499	chr4A	1326	scaffold19877	665869478	667227497	-	1358020	751837965
Chr4A	1500	chr4A	1327	scaffold33146	667252015	668752418	+	1500404	751837965
Chr4A	1501	chrUn		scaffold11430	668752918	669064286	-	311369	751837965
Chr4A	1502	chr4A	1328	scaffold68107	669064786	672683768	-	3618983	751837965
Chr4A	1503	chrUn		scaffold153793	672987055	673177581	+	190527	751837965
Chr4A	1504	chr4A	1329	scaffold95702	673184166	674436709	-	1252544	751837965
Chr4A	1505	chr4A	1336	scaffold91479	674437710	675736910	+	1299201	751837965
Chr4A	1506	chr4A	1335	scaffold41733	675920707	676422207	-	501501	751837965
Chr4A	1507	chr4A	1334	scaffold77154	676630311	677792245	+	1161935	751837965
Chr4A	1508	chr4A	1333	scaffold38934	677899662	680069790	+	2170129	751837965
Chr4A	1509	chr4A	1332	scaffold92998	680080439	681494373	+	1413935	751837965
Chr4A	1510	chr4A	1331	scaffold102031	681511299	682285010	+	773712	751837965
Chr4A	1511	chrUn		scaffold15838	682341191	682605776	-	264586	751837965
Chr4A	1512	chrUn		scaffold24440	682606942	682838905	+	231964	751837965
Chr4A	1513	chrUn		scaffold16315	682928448	683227892	+	299445	751837965
Chr4A	1514	chr4A	1330	scaffold30817	683254524	683672956	+	418433	751837965
Chr4A	1515	chr4A	1337	scaffold79631	683673957	684751792	+	1077836	751837965
Chr4A	1516	chr4A	1338	scaffold21088	684752428	685271819	-	519392	751837965
Chr4A	1517	chrUn		scaffold131910	685272819	685551031	-	278213	751837965
Chr4A	1518	chr4A	1339	scaffold10252	685567791	685943806	+	376016	751837965
Chr4A	1519	chrUn		scaffold82629	685972212	686272052	-	299841	751837965
Chr4A	1520	chrUn		scaffold105770	686281747	686571120	-	289374	751837965
Chr4A	1521	chr4A	1340	scaffold125554	686586183	687271153	-	684971	751837965
Chr4A	1522	chrUn		scaffold39502	687317350	687545350	-	228001	751837965
Chr4A	1523	chr4A	1341	scaffold81870	687584355	687956305	+	371951	751837965
Chr4A	1524	chrUn		scaffold151570-5	688096319	688260883	-	164565	751837965
Chr4A	1525	chr4A	1342	scaffold43690	688266620	688653411	+	386792	751837965
Chr4A	1526	chr4A	1343	scaffold11351_r2	688976518	689260512	+	283995	751837965
Chr4A	1527	chr4A	1344	scaffold11682-4	689262749	689928177	+	665429	751837965
Chr4A	1528	chr4A	1345	scaffold29731	689948112	691915834	+	1967723	751837965
Chr4A	1529	chr4A	1343	scaffold11351_r1	691916835	692060500	+	143666	751837965
Chr4A	1530	chr4A	1346	scaffold45532	692061500	693175998	-	1114499	751837965
Chr4A	1531	chr4A	1347	scaffold34600	693199487	696401990	-	3202504	751837965
Chr4A	1532	chrUn		scaffold93437	696545508	696864276	+	318769	751837965
Chr4A	1533	chr4A	1348	scaffold28723	696870744	697721325	-	850582	751837965
Chr4A	1534	chr4A	1349	scaffold17261	697750518	698643932	-	893415	751837965
Chr4A	1535	chr4A	1350	scaffold28612	698644932	699445603	-	800672	751837965
Chr4A	1536	chrUn		scaffold28613	699458886	699640915	+	182030	751837965
Chr4A	1537	chr4A	1351	scaffold54817	699717555	700418346	-	700792	751837965
Chr4A	1538	chr4A	1352	scaffold108744	700665262	702401886	+	1736625	751837965
Chr4A	1539	chrUn		scaffold3305	702426404	702644052	-	217649	751837965
Chr4A	1540	chrUn		scaffold97369	702661350	703087137	+	425788	751837965
Chr4A	1541	chr4A	1353	scaffold51987	703110639	703599910	-	489272	751837965
Chr4A	1542	chr4A	1354	scaffold70862	703600410	704061882	-	461473	751837965
Chr4A	1543	chr4A	1355	scaffold58407	704123110	705607231	-	1484122	751837965
Chr4A	1544	chr4A	1356	scaffold108156	705610291	706666691	+	1056401	751837965
Chr4A	1545	chr4A	1357	scaffold87107	706720892	707738400	+	1017509	751837965
Chr4A	1546	chr4A	1358	scaffold80997	707777587	709058924	+	1281338	751837965
Chr4A	1547	chrUn		scaffold51567	709064527	709262848	+	198322	751837965
Chr4A	1548	chrUn		scaffold10661	709332535	709508001	-	175467	751837965
Chr4A	1549	chr4A	1359	scaffold10662	709525051	715020892	+	5503490	751837965
Chr4A	1550	chr4A	1360	scaffold58249	715062359	715497014	+	434656	751837965
Chr4A	1551	chrUn		scaffold125968	715630441	715759843	+	129403	751837965
Chr4A	1552	chr4A	1361	scaffold18521	716037544	716887475	-	849932	751837965
Chr4A	1553	chr4A	1362	scaffold105579	716890228	717469283	-	579056	751837965
Chr4A	1554	chr4A	1363	scaffold107246	717719780	718034408	-	314629	751837965
Chr4A	1555	chr4A	1364	scaffold57653	718182335	718659471	+	477137	751837965
Chr4A	1556	chr4A	1365	scaffold61698	718679974	719277747	+	597774	751837965
Chr4A	1557	chr4A	1366	scaffold48757	719465407	719855123	-	389717	751837965
Chr4A	1558	chr4A	1369	scaffold68254_r2	719856124	719941167	-	85044	751837965
Chr4A	1559	chr4A	1367	scaffold37268	719942165	720969653	-	1027489	751837965
Chr4A	1560	chrUn		scaffold88763	721023340	721289079	+	265740	751837965
Chr4A	1561	chr4A	1368	scaffold29494	721306648	722553708	-	1247061	751837965
Chr4A	1562	chr4A	1369	scaffold68254_r1	722636538	722943582	-	307045	751837965
Chr4A	1563	chr4A	1370	scaffold110036-5	722956859	723264718	-	307860	751837965
Chr4A	1564	chr4A	1371	scaffold2958	723278070	723714608	+	436539	751837965
Chr4A	1565	chrUn		scaffold101829	723828762	723905412	-	76651	751837965
Chr4A	1566	chr4A	1372	scaffold82819	723935970	724803056	-	867087	751837965
Chr4A	1567	chr4A	1373	scaffold89722	725051027	725468234	-	417208	751837965
Chr4A	1568	chrUn		scaffold9611	725678219	725903654	+	225436	751837965
Chr4A	1569	chr4A	1374	scaffold33702	726084379	727176509	-	1092131	751837965
Chr4A	1570	chrUn		scaffold42256	727484761	727630113	-	145353	751837965
Chr4A	1571	chr4A	1375	scaffold52844	727685512	728105832	-	420321	751837965
Chr4A	1572	chrUn		scaffold43349	728199025	728343899	-	144875	751837965
Chr4A	1573	chr4A	1376	scaffold41561	728347514	728965081	+	617568	751837965
Chr4A	1574	chr4A	1377	scaffold4752-4	728972537	729695503	-	722967	751837965
Chr4A	1575	chr4A	1378	scaffold4752-1	729697851	730633159	-	935309	751837965
Chr4A	1576	chr4A	1379	scaffold58204	730994866	731557577	+	562712	751837965
Chr4A	1577	chr4A	1380	scaffold17484	731648832	734666958	+	3018127	751837965
Chr4A	1578	chr4A	1381	scaffold16326	734774057	735884964	-	1110908	751837965
Chr4A	1579	chr4A	1382	scaffold107981	735885963	736362367	+	476405	751837965
Chr4A	1580	chrUn		scaffold1396	736494934	736613490	-	118557	751837965
Chr4A	1581	chr4A	1383	scaffold73557-3	736638849	739074761	+	2435913	751837965
Chr4A	1582	chrUn		scaffold25858	739361028	739612160	+	251133	751837965
Chr4A	1583	chr4A	1384	scaffold36497	739654360	740142435	+	488076	751837965
Chr4A	1584	chrUn		scaffold30701	740259586	740427426	+	167841	751837965
Chr4A	1585	chr4A	1385	scaffold66976	740445483	741035934	-	590452	751837965
Chr4A	1586	chr4A	1386	scaffold105687-1	741068428	741605270	+	536843	751837965
Chr4A	1587	chr4A	1387	scaffold59103	741813949	742419276	+	605328	751837965
Chr4A	1588	chrUn		scaffold38768-2	742431182	742716840	-	285659	751837965
Chr4A	1589	chrUn		scaffold23821	742864721	743120830	-	256110	751837965
Chr4A	1590	chr4A	1393	scaffold98830-2	743121330	745313935	+	2192606	751837965
Chr4A	1591	chr4A	1394	scaffold74146	745327376	746190739	+	863364	751837965
Chr4A	1592	chr4A	1392	scaffold30399	746438551	747750013	-	1311463	751837965
Chr4A	1593	chr4A	1391	scaffold100189	747963682	748821490	-	857809	751837965
Chr4A	1594	chr4A	1390	scaffold23710	749107210	750093039	-	985830	751837965
Chr4A	1595	chrUn		scaffold84718	750149758	750401664	+	251907	751837965
Chr4A	1596	chr4A	1389	scaffold11647_r2	750413424	750857844	-	444421	751837965
Chr4A	1597	chr4A	1388	scaffold7201	751005436	751837965	+	832530	751837965
Chr4B	1598	chr4B	1397	scaffold96144	1	1065949	+	1065949	684047826
Chr4B	1599	chr4B	1396	scaffold67034	1089509	1998207	-	908699	684047826
Chr4B	1600	chr4B	1395	scaffold136482	2051973	5962898	-	3910926	684047826
Chr4B	1601	chr4B	1398	scaffold86848	6081047	6734116	-	653070	684047826
Chr4B	1602	chr4B	1399	scaffold5314	6829779	10879877	-	4050099	684047826
Chr4B	1603	chr4B	1400	scaffold38250	10924596	12366567	+	1441972	684047826
Chr4B	1604	chr4B	1401	scaffold11294	12366668	13793336	+	1426669	684047826
Chr4B	1605	chr4B	1402	scaffold24944	13794337	14179627	+	385291	684047826
Chr4B	1606	chr4B	1403	scaffold115442	14180628	14899612	-	718985	684047826
Chr4B	1607	chr4B	1404	scaffold58388	14982913	18669033	+	3686121	684047826
Chr4B	1608	chr4B	1405	scaffold56288	18745689	19642509	+	896821	684047826
Chr4B	1609	chr4B	1406	scaffold80038	19682609	20652547	-	969939	684047826
Chr4B	1610	chr4B	1407	scaffold104160	20658017	21433641	-	775625	684047826
Chr4B	1611	chr4B	1408	scaffold11839	21458578	22227416	-	768839	684047826
Chr4B	1612	chr4B	1409	scaffold6269	22246418	23713699	-	1467282	684047826
Chr4B	1613	chr4B	1410	scaffold46892	23718031	25204297	-	1486267	684047826
Chr4B	1614	chr4B	1411	scaffold61527	25262625	27392593	+	2129969	684047826
Chr4B	1615	chr4B	1412	scaffold13870	27447270	40852449	+	13405180	684047826
Chr4B	1616	chr4B	1413	scaffold82207	41077391	42496694	+	1419304	684047826
Chr4B	1617	chr4B	1414	scaffold66006	42868643	43811509	+	942867	684047826
Chr4B	1618	chr4B	1415	scaffold6120	43988049	50093618	+	6105570	684047826
Chr4B	1619	chr4B	1416	scaffold7619	50188795	63289093	+	13100299	684047826
Chr4B	1620	chr4B	1417	scaffold70350	63489675	64939433	+	1449759	684047826
Chr4B	1621	chr4B	1418	scaffold13543	64980176	65986895	-	1006720	684047826
Chr4B	1622	chr4B	1419	scaffold71554	65996112	71415950	+	5419839	684047826
Chr4B	1623	chr4B	1420	scaffold14126	71506323	76394995	-	4888673	684047826
Chr4B	1624	chr4B	1421	scaffold60492	76396882	77184925	+	788044	684047826
Chr4B	1625	chr4B	1422	scaffold146558	77190893	77907129	-	716237	684047826
Chr4B	1626	chr4B	1423	scaffold1656	77928573	79311456	-	1382884	684047826
Chr4B	1627	chr4B	1424	scaffold140556	79312457	91355159	+	12042703	684047826
Chr4B	1628	chr4B	1425	scaffold30179	91385231	96896303	-	5511073	684047826
Chr4B	1629	chr4B	1426	scaffold119546	96896803	98937792	-	2040990	684047826
Chr4B	1630	chr4B	1427	scaffold43177	98953536	101569758	+	2616223	684047826
Chr4B	1631	chr4B	1428	scaffold35943	101574654	105852137	-	4277484	684047826
Chr4B	1632	chr4B	1429	scaffold109693	105889678	119473879	-	13584202	684047826
Chr4B	1633	chr4B	1430	scaffold106481	119474880	127657686	-	8182807	684047826
Chr4B	1634	chr4B	1431	scaffold18319	127679688	136026089	-	8346402	684047826
Chr4B	1635	chr4B	1432	scaffold117613	136030225	136983075	-	952851	684047826
Chr4B	1636	chr4B	1433	scaffold59551	136998888	147002919	+	10004032	684047826
Chr4B	1637	chr4B	1434	scaffold66130	147025793	157675942	-	10650150	684047826
Chr4B	1638	chr4B	1435	scaffold81098	157736580	160889460	+	3152881	684047826
Chr4B	1639	chr4B	1436	scaffold98464	161045042	163501153	-	2456112	684047826
Chr4B	1640	chr4B	1437	scaffold31497-1	163608503	166074589	+	2466087	684047826
Chr4B	1641	chr4B	1438	scaffold67031-1	166075590	167388890	-	1313301	684047826
Chr4B	1642	chr4B	1439	scaffold11299	167391154	170114515	+	2723362	684047826
Chr4B	1643	chr4B	1440	scaffold46992	170115516	171097568	+	982053	684047826
Chr4B	1644	chr4B	1443	scaffold56447-4_r1	171098569	171763278	+	664710	684047826
Chr4B	1645	chr4B	1441	scaffold47564	171803789	178838933	+	7035145	684047826
Chr4B	1646	chr4B	1442	scaffold45107	178949344	180146685	+	1197342	684047826
Chr4B	1647	chr4B	1443	scaffold56447-4_r2	180165329	181640380	-	1475052	684047826
Chr4B	1648	chr4B	1444	scaffold69147	181640480	183727760	+	2087281	684047826
Chr4B	1649	chr4B	1445	scaffold26768	183763253	187982453	+	4219201	684047826
Chr4B	1650	chr4B	1446	scaffold18874-1	187983454	192086818	+	4103365	684047826
Chr4B	1651	chr4B	1447	scaffold59093	192087819	197802570	+	5714752	684047826
Chr4B	1652	chr4B	1448	scaffold28570	197812686	198281998	-	469313	684047826
Chr4B	1653	chr4B	1449	scaffold62901	198282999	205391193	+	7108195	684047826
Chr4B	1654	chr4B	1450	scaffold38296	205400390	207152927	+	1752538	684047826
Chr4B	1655	chr4B	1451	scaffold37080	207153928	210253972	-	3100045	684047826
Chr4B	1656	chr4B	1452	scaffold72071-1	210293293	220673781	-	10380489	684047826
Chr4B	1657	chr4B	1453	scaffold38858	220686589	221952294	-	1265706	684047826
Chr4B	1658	chr4B	1454	scaffold96535	221964336	222510849	-	546514	684047826
Chr4B	1659	chr4B	1455	scaffold126120	222514246	232637008	-	10122763	684047826
Chr4B	1660	chr4B	1456	scaffold466	232638182	234051893	-	1413712	684047826
Chr4B	1661	chr4B	1457	scaffold111232	234061506	234844950	+	783445	684047826
Chr4B	1662	chr4B	1458	scaffold79958	234847747	235262095	-	414349	684047826
Chr4B	1663	chr4B	1459	scaffold95942	235263096	235872938	-	609843	684047826
Chr4B	1664	chr4B	1460	scaffold88869	235873939	238113362	-	2239424	684047826
Chr4B	1665	chr4B	1461	scaffold88628	238114363	239457645	-	1343283	684047826
Chr4B	1666	chr4B	1462	scaffold17668	239472294	244580984	-	5108691	684047826
Chr4B	1667	chr4B	1463	scaffold37856	244581985	250121213	-	5539229	684047826
Chr4B	1668	chr4B	1464	scaffold69097	250282905	250947221	-	664317	684047826
Chr4B	1669	chr4B	1465	scaffold14848	250960450	253965811	+	3005362	684047826
Chr4B	1670	chr4B	1466	scaffold54015	253975171	254495135	+	519965	684047826
Chr4B	1671	chr4B	1467	scaffold120347	254500570	256601727	+	2101158	684047826
Chr4B	1672	chr4B	1468	scaffold50963	256602728	259860009	-	3257282	684047826
Chr4B	1673	chr4B	1469	scaffold131877	259861010	260779957	+	918948	684047826
Chr4B	1674	chr4B	1470	scaffold49938	260787726	265397222	-	4609497	684047826
Chr4B	1675	chr4B	1471	scaffold83602	265409466	267154630	-	1745165	684047826
Chr4B	1676	chr4B	1472	scaffold68640	267164544	270146447	+	2981904	684047826
Chr4B	1677	chr4B	1473	scaffold78059	270171636	276657860	-	6486225	684047826
Chr4B	1678	chr4B	1474	scaffold35053-2	276670263	277856829	-	1186567	684047826
Chr4B	1679	chr4B	1475	scaffold88103	277857830	278507715	+	649886	684047826
Chr4B	1680	chr4B	1476	scaffold101971	278508716	285221812	-	6713097	684047826
Chr4B	1681	chr4B	1477	scaffold60915	285225605	286058572	-	832968	684047826
Chr4B	1682	chr4B	1478	scaffold81206	286059573	286439875	+	380303	684047826
Chr4B	1683	chr4B	1479	scaffold21634	286440876	286804207	+	363332	684047826
Chr4B	1684	chr4B	1480	scaffold43559	286805208	288049615	-	1244408	684047826
Chr4B	1685	chr4B	1481	scaffold43560	288057400	288565280	+	507881	684047826
Chr4B	1686	chr4B	1482	scaffold93073	288566281	288894934	+	328654	684047826
Chr4B	1687	chr4B	1483	scaffold17301	288895935	289334101	+	438167	684047826
Chr4B	1688	chr4B	1484	scaffold94422	289335102	289928577	+	593476	684047826
Chr4B	1689	chr4B	1485	scaffold49059	289929578	290256445	+	326868	684047826
Chr4B	1690	chr4B	1486	scaffold63618	290257446	290777600	+	520155	684047826
Chr4B	1691	chr4B	1487	scaffold101518	290778601	291149177	+	370577	684047826
Chr4B	1692	chr4B	1488	scaffold87658	291150178	291741488	+	591311	684047826
Chr4B	1693	chr4B	1489	scaffold74250	291787317	296424929	+	4637613	684047826
Chr4B	1694	chr4B	1490	scaffold10110	296425930	300494461	-	4068532	684047826
Chr4B	1695	chr4B	1491	scaffold164-1	300588491	301116668	-	528178	684047826
Chr4B	1696	chr4B	1492	scaffold12403	301117669	305524737	+	4407069	684047826
Chr4B	1697	chr4B	1493	scaffold18192	305535424	310829182	-	5293759	684047826
Chr4B	1698	chr4B	1494	scaffold2624	310830183	313919407	-	3089225	684047826
Chr4B	1699	chr4B	1495	scaffold58243	313942052	314584330	+	642279	684047826
Chr4B	1700	chrUn		scaffold54869	314591866	314783800	+	191935	684047826
Chr4B	1701	chr4B	1496	scaffold130825	314812939	321975063	+	7162125	684047826
Chr4B	1702	chr4B	1497	scaffold17085-1	321976064	323928534	+	1952471	684047826
Chr4B	1703	chr4B	1498	scaffold51973	323929535	324686023	+	756489	684047826
Chr4B	1704	chr4B	1499	scaffold55288-2	324724917	326823841	-	2098925	684047826
Chr4B	1705	chr4B	1500	scaffold87560	326828175	331688484	+	4860310	684047826
Chr4B	1706	chr4B	1501	scaffold134491	331769703	333251203	+	1481501	684047826
Chr4B	1707	chr4B	1502	scaffold10984-1	333258036	333902089	+	644054	684047826
Chr4B	1708	chr4B	1503	scaffold95586	333903090	343212481	-	9309392	684047826
Chr4B	1709	chr4B	1504	scaffold30182-1	343213482	345303685	-	2090204	684047826
Chr4B	1710	chr4B	1505	scaffold2951	345304686	346046984	+	742299	684047826
Chr4B	1711	chr4B	1506	scaffold58618	346057161	347022134	+	964974	684047826
Chr4B	1712	chrUn		scaffold22692	347033642	347272593	-	238952	684047826
Chr4B	1713	chr4B	1507	scaffold34008	347286291	350017442	+	2731152	684047826
Chr4B	1714	chr4B	1508	scaffold4873	350018443	351728870	+	1710428	684047826
Chr4B	1715	chr4B	1509	scaffold25519	351729871	352218750	+	488880	684047826
Chr4B	1716	chr4B	1510	scaffold125346	352242930	358420511	-	6177582	684047826
Chr4B	1717	chr4B	1511	scaffold130191	358421512	358783618	+	362107	684047826
Chr4B	1718	chr4B	1512	scaffold100532	358795534	359476522	-	680989	684047826
Chr4B	1719	chr4B	1513	scaffold10796	359477523	361377873	-	1900351	684047826
Chr4B	1720	chr4B	1514	scaffold76062	361429502	364176066	+	2746565	684047826
Chr4B	1721	chr4B	1515	scaffold25187	364177067	364964232	+	787166	684047826
Chr4B	1722	chr4B	1516	scaffold9309	364965233	367125859	+	2160627	684047826
Chr4B	1723	chr4B	1517	scaffold52407	367126860	368328592	+	1201733	684047826
Chr4B	1724	chrUn		scaffold81277	368345273	368583223	+	237951	684047826
Chr4B	1725	chr4B	1518	scaffold2906-1	368584224	370205107	-	1620884	684047826
Chr4B	1726	chr4B	1519	scaffold93947	370217635	379494219	-	9276585	684047826
Chr4B	1727	chr4B	1520	scaffold75	379495220	387419057	+	7923838	684047826
Chr4B	1728	chr4B	1521	scaffold119197	387428669	395622697	-	8194029	684047826
Chr4B	1729	chr4B	1522	scaffold33225	395634963	399881910	+	4246948	684047826
Chr4B	1730	chr4B	1523	scaffold93128	399919343	414362150	-	14442808	684047826
Chr4B	1731	chr4B	1524	scaffold5638-2	414370858	416104635	-	1733778	684047826
Chr4B	1732	chr4B	1525	scaffold25429	416220759	417334624	-	1113866	684047826
Chr4B	1733	chr4B	1526	scaffold17478	417340747	420109926	+	2769180	684047826
Chr4B	1734	chr4B	1527	scaffold54913	420126367	420537995	+	411629	684047826
Chr4B	1735	chr4B	1528	scaffold111932	420542683	429972355	+	9429673	684047826
Chr4B	1736	chr4B	1529	scaffold124469	429973356	430734449	-	761094	684047826
Chr4B	1737	chr4B	1530	scaffold34184	430747473	431331003	-	583531	684047826
Chr4B	1738	chr4B	1531	scaffold95718	431333862	440848981	-	9515120	684047826
Chr4B	1739	chr4B	1532	scaffold87099	440910231	443278550	+	2368320	684047826
Chr4B	1740	chr4B	1533	scaffold69476	443299715	450843930	-	7544216	684047826
Chr4B	1741	chr4B	1534	scaffold52004	450850701	459798062	+	8947362	684047826
Chr4B	1742	chr4B	1535	scaffold103084	459801845	461723358	+	1921514	684047826
Chr4B	1743	chr4B	1536	scaffold6280	461724359	462055187	-	330829	684047826
Chr4B	1744	chr4B	1537	scaffold6281-1	462060800	464739345	+	2678546	684047826
Chr4B	1745	chr4B	1538	scaffold7935	464739845	467562307	+	2822463	684047826
Chr4B	1746	chr4B	1539	scaffold122974-1	467580597	471198265	+	3617669	684047826
Chr4B	1747	chr4B	1540	scaffold2100	471214281	477897505	+	6683225	684047826
Chr4B	1748	chr4B	1541	scaffold65219-4	477898005	481944255	-	4046251	684047826
Chr4B	1749	chr4B	1542	scaffold65219-1	481949243	489243248	-	7294006	684047826
Chr4B	1750	chr4B	1543	scaffold98475	489245991	505746237	+	16500247	684047826
Chr4B	1751	chr4B	1544	scaffold15935	505777941	517072380	+	11294440	684047826
Chr4B	1752	chr4B	1545	scaffold71542	517072543	520504127	-	3431585	684047826
Chr4B	1753	chrUn		scaffold20061	520505128	520679780	+	174653	684047826
Chr4B	1754	chr4B	1546	scaffold112807	520690115	522203359	+	1513245	684047826
Chr4B	1755	chr4B	1547	scaffold75920	522282770	532456901	-	10174132	684047826
Chr4B	1756	chr4B	1548	scaffold14906	532523129	536458981	-	3935853	684047826
Chr4B	1757	chr4B	1549	scaffold59764	536459082	537812816	+	1353735	684047826
Chr4B	1758	chr4B	1550	scaffold118043	537925988	540654201	-	2728214	684047826
Chr4B	1759	chr4B	1551	scaffold22729	540660574	542336165	+	1675592	684047826
Chr4B	1760	chr4B	1552	scaffold96729-1	542341778	547789579	+	5447802	684047826
Chr4B	1761	chr4B	1553	scaffold64476	547799257	556181617	+	8382361	684047826
Chr4B	1762	chrUn		scaffold111851	556182618	556245081	-	62464	684047826
Chr4B	1763	chr4B	1554	scaffold24366	556246082	557289233	+	1043152	684047826
Chr4B	1764	chr4B	1555	scaffold13769	557322150	558356452	-	1034303	684047826
Chr4B	1765	chr4B	1556	scaffold34960	558370783	559790663	-	1419881	684047826
Chr4B	1766	chr4B	1557	scaffold30548	559793323	560390447	+	597125	684047826
Chr4B	1767	chr4B	1558	scaffold18677	560406839	562194379	-	1787541	684047826
Chr4B	1768	chrUn		scaffold12485-1	562240622	562497284	+	256663	684047826
Chr4B	1769	chr4B	1559	scaffold12485-2	562497385	567676918	+	5179534	684047826
Chr4B	1770	chr4B	1560	scaffold48551	567688658	571729595	+	4040938	684047826
Chr4B	1771	chr4B	1561	scaffold16610	571741628	573087369	-	1345742	684047826
Chr4B	1772	chr4B	1562	scaffold150284	573179889	574728273	-	1548385	684047826
Chr4B	1773	chr4B	1563	scaffold10871	574769097	578391279	+	3622183	684047826
Chr4B	1774	chr4B	1564	scaffold147032	578409453	585945174	-	7535722	684047826
Chr4B	1775	chr4B	1565	scaffold15493	586030194	586295219	-	265026	684047826
Chr4B	1776	chr4B	1566	scaffold154822	586327853	590136852	+	3809000	684047826
Chr4B	1777	chr4B	1567	scaffold5200	590137352	592977247	+	2839896	684047826
Chr4B	1778	chr4B	1568	scaffold26151	592988186	595261564	+	2273379	684047826
Chr4B	1779	chr4B	1569	scaffold107378	595296782	605707542	-	10410761	684047826
Chr4B	1780	chr4B	1570	scaffold22633-1	605708042	611455976	-	5747935	684047826
Chr4B	1781	chr4B	1571	scaffold80037	611476535	619689491	-	8212957	684047826
Chr4B	1782	chr4B	1572	scaffold27599	619713081	622634205	+	2921125	684047826
Chr4B	1783	chr4B	1573	scaffold1790-3	622635206	634815202	+	12179997	684047826
Chr4B	1784	chr4B	1574	scaffold37012	634856791	644061272	+	9204482	684047826
Chr4B	1785	chr4B	1575	scaffold50978	644074190	647155112	+	3080923	684047826
Chr4B	1786	chr4B	1576	scaffold73557-1	647214835	648933566	+	1718732	684047826
Chr4B	1787	chr4B	1577	scaffold162366	649103280	649654749	+	551470	684047826
Chr4B	1788	chr4B	1578	scaffold24403	649679630	652241202	-	2561573	684047826
Chr4B	1789	chr4B	1579	scaffold107458	652241702	653954719	+	1713018	684047826
Chr4B	1790	chr4B	1580	scaffold102526	654116873	655149089	-	1032217	684047826
Chr4B	1791	chr4B	1581	scaffold39972	655300008	657450936	-	2150929	684047826
Chr4B	1792	chr4B	1582	scaffold48744	657476832	658276071	-	799240	684047826
Chr4B	1793	chr4B	1583	scaffold38583-1_r2	658286025	658771689	-	485665	684047826
Chr4B	1794	chr4B	1584	scaffold59472	658856881	660169625	-	1312745	684047826
Chr4B	1795	chr4B	1585	scaffold109037	660408081	661180558	+	772478	684047826
Chr4B	1796	chr4B	1586	scaffold32033	661480953	665909269	-	4428317	684047826
Chr4B	1797	chrUn		scaffold89440	665976768	666224953	-	248186	684047826
Chr4B	1798	chr4B	1587	scaffold11674	666384258	667328013	-	943756	684047826
Chr4B	1799	chr4B	1588	scaffold14276	667399657	667887182	-	487526	684047826
Chr4B	1800	chr4B	1589	scaffold81007	668409915	669567513	+	1157599	684047826
Chr4B	1801	chr4B	1590	scaffold80930	669628296	670132529	-	504234	684047826
Chr4B	1802	chr4B	1591	scaffold43517	670210895	670513245	+	302351	684047826
Chr4B	1803	chr4B	1592	scaffold68341	670536581	671845910	+	1309330	684047826
Chr4B	1804	chr4B	1593	scaffold19467	671849355	672196102	+	346748	684047826
Chr4B	1805	chr4B	1594	scaffold39159	672270780	672674385	-	403606	684047826
Chr4B	1806	chr4B	1595	scaffold47801	672690435	672991573	+	301139	684047826
Chr4B	1807	chrUn		scaffold73914	673019269	673289604	+	270336	684047826
Chr4B	1808	chrUn		scaffold10551	673439987	673769370	+	329384	684047826
Chr4B	1809	chr4B	1596	scaffold4041	673769870	676401367	-	2631498	684047826
Chr4B	1810	chr4B	1597	scaffold88679	676411860	677258857	+	846998	684047826
Chr4B	1811	chrUn		scaffold6243	677377902	677567849	-	189948	684047826
Chr4B	1812	chr4B	1598	scaffold126454	677568850	678622893	-	1054044	684047826
Chr4B	1813	chr4B	1599	scaffold55610	678623894	679037955	+	414062	684047826
Chr4B	1814	chr4B	1602	scaffold108029	679038956	679669748	+	630793	684047826
Chr4B	1815	chr4B	1603	scaffold240	679670749	680353637	+	682889	684047826
Chr4B	1816	chr4B	1604	scaffold53284	680786674	682241914	-	1455241	684047826
Chr4B	1817	chr4B	1601	scaffold50068	682242915	683002866	+	759952	684047826
Chr4B	1818	chr4B	1600	scaffold37523	683127059	683743990	-	616932	684047826
Chr4B	1819	chrUn		scaffold54532	683751659	684047826	-	296168	684047826
Chr5A	1820	chr5A	1606	scaffold51264	1	693175	+	693175	715386202
Chr5A	1821	chr5B	1748	scaffold64676	693276	1233994	+	540719	715386202
Chr5A	1822	chrUn		scaffold91442	1671533	1978670	-	307138	715386202
Chr5A	1823	chr5A	1605	scaffold50673	1979671	4534762	-	2555092	715386202
Chr5A	1824	chr5A	1607	scaffold2815	5033234	8416590	+	3383357	715386202
Chr5A	1825	chr5A	1608	scaffold49259	8420642	8840577	+	419936	715386202
Chr5A	1826	chr5A	1609	scaffold113290	8851087	9575605	-	724519	715386202
Chr5A	1827	chr5A	1610	scaffold104341	9771358	11666527	-	1895170	715386202
Chr5A	1828	chrUn		scaffold92148	11823275	12086635	+	263361	715386202
Chr5A	1829	chr5A	1611	scaffold58665	12441130	13730102	+	1288973	715386202
Chr5A	1830	chrUn		scaffold24865	13740124	13969049	+	228926	715386202
Chr5A	1831	chr5A	1612	scaffold82198	14012891	15510077	+	1497187	715386202
Chr5A	1832	chr5A	1613	scaffold58004	15540817	21728498	+	6187682	715386202
Chr5A	1833	chr5A	1614	scaffold33270	21738271	22231048	+	492778	715386202
Chr5A	1834	chr5A	1615	scaffold6590	22231560	32740315	-	10508756	715386202
Chr5A	1835	chr5A	1616	scaffold12131	33291554	34030548	+	738995	715386202
Chr5A	1836	chr5A	1617	scaffold53532	34040119	34900210	+	860092	715386202
Chr5A	1837	chr5A	1618	scaffold41579	34915650	40052305	+	5136656	715386202
Chr5A	1838	chr5A	1619	scaffold79235	40170522	41221820	+	1051299	715386202
Chr5A	1839	chr5A	1620	scaffold88082	41375521	46335127	-	4959607	715386202
Chr5A	1840	chr5A	1621	scaffold54359	46348191	47765808	-	1417618	715386202
Chr5A	1841	chr5A	1622	scaffold35773	47766308	49774687	+	2008380	715386202
Chr5A	1842	chr5A	1623	scaffold62145	49786134	61436929	-	11650796	715386202
Chr5A	1843	chr5A	1624	scaffold131659	61470184	63201149	-	1730966	715386202
Chr5A	1844	chr5A	1625	scaffold71261	63286099	82781205	-	19495107	715386202
Chr5A	1845	chr5A	1626	scaffold39950	82891352	87702292	-	4810941	715386202
Chr5A	1846	chr5A	1627	scaffold120713	87707152	95100553	+	7393402	715386202
Chr5A	1847	chr5A	1628	scaffold114770	95124452	100459393	-	5334942	715386202
Chr5A	1848	chr5A	1629	scaffold21395	100468183	107071573	-	6603391	715386202
Chr5A	1849	chr5A	1630	scaffold100920	107183776	120148395	-	12964620	715386202
Chr5A	1850	chr5A	1631	scaffold35069	120148496	128831173	+	8682678	715386202
Chr5A	1851	chr5A	1632	scaffold112460	128889034	133731202	+	4842169	715386202
Chr5A	1852	chr5A	1633	scaffold61592	133736697	137957584	+	4220888	715386202
Chr5A	1853	chr5A	1634	scaffold32296	137958084	139117046	-	1158963	715386202
Chr5A	1854	chr5A	1635	scaffold1665	139137519	141861194	+	2723676	715386202
Chr5A	1855	chr5A	1636	scaffold19561	141861694	153781628	-	11919935	715386202
Chr5A	1856	chr5A	1637	scaffold17605	153785580	155250025	+	1464446	715386202
Chr5A	1857	chr5A	1638	scaffold59715	155250331	155804280	-	553950	715386202
Chr5A	1858	chr5A	1639	scaffold103968	155805281	160961211	+	5155931	715386202
Chr5A	1859	chr5A	1640	scaffold5182	160962212	164010296	+	3048085	715386202
Chr5A	1860	chr5A	1641	scaffold16259	164011297	168720883	+	4709587	715386202
Chr5A	1861	chr5A	1642	scaffold27516	168732792	170586854	-	1854063	715386202
Chr5A	1862	chr5A	1643	scaffold93310	170595811	173422701	-	2826891	715386202
Chr5A	1863	chr5A	1644	scaffold101325	173435400	178481985	-	5046586	715386202
Chr5A	1864	chr3B	1028	scaffold83302_r2	178483784	178616954	-	133171	715386202
Chr5A	1865	chrUn		scaffold12880	178924818	179101594	+	176777	715386202
Chr5A	1866	chr5A	1645	scaffold88048	179102500	182211877	+	3109378	715386202
Chr5A	1867	chr5A	1646	scaffold15713	182218018	195609196	+	13391179	715386202
Chr5A	1868	chr5A	1647	scaffold21827	195610667	200680412	+	5069746	715386202
Chr5A	1869	chr5A	1648	scaffold34168	200680829	216670040	+	15989212	715386202
Chr5A	1870	chr5A	1649	scaffold104299	216681847	224817192	+	8135346	715386202
Chr5A	1871	chr5A	1650	scaffold62985-2	224817293	228287842	+	3470550	715386202
Chr5A	1872	chr5A	1651	scaffold78048	228288842	228938653	+	649812	715386202
Chr5A	1873	chr5A	1652	scaffold86314_r1	228939654	242505859	+	13566206	715386202
Chr5A	1874	chr5A	1664	scaffold36869	242506859	257058270	-	14551412	715386202
Chr5A	1875	chr5A	1665	scaffold416	257058770	281343439	+	24284670	715386202
Chr5A	1876	chr5A	1666	scaffold19432	281356288	281766367	+	410080	715386202
Chr5A	1877	chr5A	1667	scaffold78210	281781819	293110873	+	11329055	715386202
Chr5A	1878	chr5A	1668	scaffold15755	293118108	297541331	+	4423224	715386202
Chr5A	1879	chr5A	1669	scaffold63019	297567341	300961030	+	3393690	715386202
Chr5A	1880	chr5A	1670	scaffold37563	301257476	306716547	-	5459072	715386202
Chr5A	1881	chr5A	1671	scaffold2635	306729428	314227123	+	7497696	715386202
Chr5A	1882	chr5A	1672	scaffold32857	314262604	316457231	+	2194628	715386202
Chr5A	1883	chr5A	1673	scaffold55044	316530610	328569787	-	12039178	715386202
Chr5A	1884	chr5A	1674	scaffold8053	328574546	329103530	+	528985	715386202
Chr5A	1885	chr5A	1675	scaffold28958	329109881	341130391	+	12020511	715386202
Chr5A	1886	chr5A	1676	scaffold49323	341130498	352061969	+	10931472	715386202
Chr5A	1887	chr5A	1677	scaffold32911	352089771	359129549	-	7039779	715386202
Chr5A	1888	chr5A	1678	scaffold26054	359143391	370098915	+	10955525	715386202
Chr5A	1889	chr5A	1679	scaffold68977	370115265	374988667	-	4873403	715386202
Chr5A	1890	chr5A	1680	scaffold104679	374988768	376355161	+	1366394	715386202
Chr5A	1891	chr5A	1681	scaffold40628	376370128	378792073	-	2421946	715386202
Chr5A	1892	chr5A	1682	scaffold91150	379067348	397740038	-	18672691	715386202
Chr5A	1893	chr5A	1683	scaffold3235	397743745	398372477	+	628733	715386202
Chr5A	1894	chr5A	1684	scaffold65219-3	398372578	398623671	+	251094	715386202
Chr5A	1895	chr5A	1685	scaffold35305	398765782	411406478	-	12640697	715386202
Chr5A	1896	chr5A	1686	scaffold2193	411509255	418710990	-	7201736	715386202
Chr5A	1897	chr5A	1688	scaffold107551	418711091	420973844	-	2262754	715386202
Chr5A	1898	chr5A	1652	scaffold86314_r2	421050858	426179619	+	5128762	715386202
Chr5A	1899	chr5A	1689	scaffold19293	426179720	432073833	+	5894114	715386202
Chr5A	1900	chr5A	1690	scaffold27085	432076881	435423355	+	3346475	715386202
Chr5A	1901	chr5A	1691	scaffold43409	435566531	447146436	-	11579906	715386202
Chr5A	1902	chr5A	1692	scaffold40459	447167515	451547850	+	4380336	715386202
Chr5A	1903	chr5A	1693	scaffold11103	451605217	454771145	-	3165929	715386202
Chr5A	1904	chr5A	1694	scaffold129096	455099497	458321330	-	3221834	715386202
Chr5A	1905	chr5A	1653	scaffold2796	458322331	458931591	-	609261	715386202
Chr5A	1906	chr5A	1654	scaffold4581	458932592	459425273	+	492682	715386202
Chr5A	1907	chr5A	1655	scaffold16808	459426274	459986727	+	560454	715386202
Chr5A	1908	chr5A	1656	scaffold55817	459987728	460445622	+	457895	715386202
Chr5A	1909	chr5A	1657	scaffold135650	460446623	461077649	+	631027	715386202
Chr5A	1910	chr1A	45	scaffold38209	461078650	461740662	+	662013	715386202
Chr5A	1911	chr5A	1658	scaffold38513	461740763	462341243	-	600481	715386202
Chr5A	1912	chr5A	1659	scaffold33925	462648677	475529375	-	12880699	715386202
Chr5A	1913	chr5A	1660	scaffold43122	475597786	480412700	-	4814915	715386202
Chr5A	1914	chr5A	1661	scaffold27478	480544406	490086082	-	9541677	715386202
Chr5A	1915	chr5A	1662	scaffold37509	490182648	496137738	-	5955091	715386202
Chr5A	1916	chr5A	1663	scaffold92170	496164590	511491159	+	15326570	715386202
Chr5A	1917	chr4A	1237	scaffold16209	511492160	512086020	+	593861	715386202
Chr5A	1918	chr5A	1687	scaffold96209	512087021	512795619	+	708599	715386202
Chr5A	1919	chr5A	1695	scaffold40487	512796620	517409184	-	4612565	715386202
Chr5A	1920	chr5A	1696	scaffold16836	517502182	520889447	+	3387266	715386202
Chr5A	1921	chr5A	1697	scaffold9750	520890448	522042461	+	1152014	715386202
Chr5A	1922	chr5A	1698	scaffold122603	522043462	523863171	-	1819710	715386202
Chr5A	1923	chr5A	1699	scaffold59089	523867833	524302636	-	434804	715386202
Chr5A	1924	chr5A	1700	scaffold32684	524309976	525184933	+	874958	715386202
Chr5A	1925	chr5A	1701	scaffold14656	525185433	525969845	+	784413	715386202
Chr5A	1926	chr5A	1702	scaffold77340	525995941	529853502	+	3857562	715386202
Chr5A	1927	chr5A	1703	scaffold37247	529863264	535311222	-	5447959	715386202
Chr5A	1928	chr5A	1704	scaffold43710	535324717	537250611	-	1925895	715386202
Chr5A	1929	chr5A	1705	scaffold9535	537258915	538572394	+	1313480	715386202
Chr5A	1930	chr5A	1706	scaffold4423	538581919	540679528	+	2097610	715386202
Chr5A	1931	chr5A	1707	scaffold110464	540689428	547335218	+	6645791	715386202
Chr5A	1932	chr5A	1708	scaffold80180	547595213	551603222	+	4008010	715386202
Chr5A	1933	chr5A	1709	scaffold11495	553286957	559328487	+	6041531	715386202
Chr5A	1934	chr5A	1710	scaffold29129	559335715	560360540	-	1024826	715386202
Chr5A	1935	chr5A	1711	scaffold1654	560361541	562495487	+	2133947	715386202
Chr5A	1936	chr5A	1712	scaffold40612	562671315	563523206	+	851892	715386202
Chr5A	1937	chr5A	1713	scaffold58567_r1	563841040	567452745	+	3611706	715386202
Chr5A	1938	chr5A	1714	scaffold100459	567469551	569625315	-	2155765	715386202
Chr5A	1939	chr5A	1715	scaffold34068	569697563	571672676	-	1975114	715386202
Chr5A	1940	chr5A	1716	scaffold7104	571913883	573661696	-	1747814	715386202
Chr5A	1941	chr5A	1717	scaffold6096	573920949	575942564	-	2021616	715386202
Chr5A	1942	chr5A	1718	scaffold12845	575942665	576674716	-	732052	715386202
Chr5A	1943	chr5A	1719	scaffold118338	576687051	600078607	+	23391557	715386202
Chr5A	1944	chr5A	1720	scaffold44640	600085236	610382287	+	10297052	715386202
Chr5A	1945	chr5A	1721	scaffold66298	610382787	615840979	+	5458193	715386202
Chr5A	1946	chr5A	1722	scaffold15353	615848981	616477037	+	628057	715386202
Chr5A	1947	chr5A	1723	scaffold104065	616527687	618339821	+	1812135	715386202
Chr5A	1948	chr5A	1724	scaffold26333-1	618340321	622970152	+	4629832	715386202
Chr5A	1949	chrUn		scaffold67606	623031614	623155151	-	123538	715386202
Chr5A	1950	chr5A	1725	scaffold14361-9	623164478	625506379	-	2341902	715386202
Chr5A	1951	chr5A	1726	scaffold14361-1	625571405	630822573	-	5251169	715386202
Chr5A	1952	chr5A	1727	scaffold133944	630900885	632327750	+	1426866	715386202
Chr5A	1953	chr5A	1728	scaffold10849	632335113	634536553	-	2201441	715386202
Chr5A	1954	chr5A	1729	scaffold74157	634632819	639642149	-	5009331	715386202
Chr5A	1955	chr5A	1730	scaffold43261	639675987	641779549	-	2103563	715386202
Chr5A	1956	chr5A	1731	scaffold63892	641790582	645109889	+	3319308	715386202
Chr5A	1957	chrUn		scaffold26885	645130182	645320127	-	189946	715386202
Chr5A	1958	chr5A	1732	scaffold73657	645337367	645863455	-	526089	715386202
Chr5A	1959	chr5A	1733	scaffold89273	645978568	651886584	+	5908017	715386202
Chr5A	1960	chr5A	1734	scaffold12570	651887084	677408009	+	25520926	715386202
Chr5A	1961	chr5A	1735	scaffold109469-6	677435410	678593566	+	1158157	715386202
Chr5A	1962	chr5A	1736	scaffold114908	678718980	682448206	+	3729227	715386202
Chr5A	1963	chr5A	1737	scaffold83843	682514610	686720264	-	4205655	715386202
Chr5A	1964	chr5A	1738	scaffold159156	686793439	694146974	+	7353536	715386202
Chr5A	1965	chr5A	1739	scaffold6591	694162563	698247999	-	4085437	715386202
Chr5A	1966	chr5A	1740	scaffold104496	698627908	699733420	+	1105513	715386202
Chr5A	1967	chr5A	1741	scaffold85082	699818370	704947821	-	5129452	715386202
Chr5A	1968	chrUn		scaffold26271	705123336	705407092	+	283757	715386202
Chr5A	1969	chr5A	1713	scaffold58567_r2	705408092	705481546	+	73455	715386202
Chr5A	1970	chr5A	1742	scaffold32562	705482547	707704319	+	2221773	715386202
Chr5A	1971	chrUn		scaffold70964	707704413	707902581	-	198169	715386202
Chr5A	1972	chr5A	1743	scaffold70479	708067180	709927596	+	1860417	715386202
Chr5A	1973	chr5A	1744	scaffold104499	709936441	712433326	+	2496886	715386202
Chr5A	1974	chr5A	1745	scaffold16094	712492207	712989496	+	497290	715386202
Chr5A	1975	chr5A	1746	scaffold93434	713014535	715386202	+	2371668	715386202
Chr5B	1976	chr5B	1747	scaffold100087	1	1838261	+	1838261	726095352
Chr5B	1977	chrUn		scaffold41745	1839262	2244678	+	405417	726095352
Chr5B	1978	chr5B	1749	scaffold64397	2311185	2856084	+	544900	726095352
Chr5B	1979	chrUn		scaffold145163	3101107	3324092	+	222986	726095352
Chr5B	1980	chr5B	1750	scaffold119976	3325093	3822732	+	497640	726095352
Chr5B	1981	chr5B	1751	scaffold25995	3823733	4467735	+	644003	726095352
Chr5B	1982	chr5B	1752	scaffold65848	4468736	5256263	-	787528	726095352
Chr5B	1983	chr5B	1753	scaffold97824	5335897	8140274	-	2804378	726095352
Chr5B	1984	chr5B	1754	scaffold51101	8141275	9179527	-	1038253	726095352
Chr5B	1985	chr5B	1755	scaffold33568	9228040	10364817	-	1136778	726095352
Chr5B	1986	chr5B	1756	scaffold99788	10365818	11303835	+	938018	726095352
Chr5B	1987	chr5B	1757	scaffold26435	11310038	12760408	-	1450371	726095352
Chr5B	1988	chrUn		scaffold45136	12779807	13169589	-	389783	726095352
Chr5B	1989	chr5B	1758	scaffold15314	13299229	14653930	-	1354702	726095352
Chr5B	1990	chr5B	1759	scaffold22072	14691673	15151019	+	459347	726095352
Chr5B	1991	chrUn		scaffold98437-6	15152019	15366043	-	214025	726095352
Chr5B	1992	chr5B	1760	scaffold98437-1	15373531	16686380	-	1312850	726095352
Chr5B	1993	chrUn		scaffold28244	16712594	17007414	+	294821	726095352
Chr5B	1994	chrUn		scaffold122921	17250949	17427687	-	176739	726095352
Chr5B	1995	chrUn		scaffold10695	17493428	17661013	+	167586	726095352
Chr5B	1996	chr5B	1761	scaffold35680	17710308	18721397	-	1011090	726095352
Chr5B	1997	chrUn		scaffold12486	18818473	19197971	-	379499	726095352
Chr5B	1998	chrUn		scaffold77660	19393668	19571841	-	178174	726095352
[truncated: 1,155 more rows]

## Sheet: Notes
	Explanation of colored cells
		From ChrUn (unassigned scaffolds in WEW_v1.0)
		Change of orientation/change of chromosome
		Change of order
		Chimeric scaffold
	Psm = pseudomolecul
